# Supplementary material
Source: PubMed Central journal article supplement (PMC4074090)

# Supporting Information

for

## Chemoenzymatic synthesis of sialosides containing C7-modified sialic acids and their application in sialidase substrate specificity studies

Zahra Khedri<sup>a,b</sup>, Yanhong Li<sup>a</sup>, Saddam Muthana<sup>a,c</sup>, Musleh M. Muthana<sup>a</sup>, Ching-Wen Hsiao<sup>a</sup>, Hai Yu<sup>a</sup>, Xi Chen<sup>a,\*</sup>

<sup>a</sup>Department of Chemistry, University of California, One Shields Avenue, Davis, California 95616, USA

<sup>b</sup>Current address: Department of Pharmaceutical Chemistry, University of Kansas, Lawrence, KS 66047, USA.

<sup>c</sup>Current address: Chemical Biology Laboratory, National Cancer Institute at Frederick, National Institutes of Health, Frederick, MD 21702, USA

\* Corresponding Author. Tel: +1 530 7546037; fax: +1 530 7528995.  
E-mail address: xiichen@ucdavis.edu (X. Chen)

### Table of Contents

|                                                                                                    |     |
|----------------------------------------------------------------------------------------------------|-----|
| Cover page.....                                                                                    | S1  |
| <sup>1</sup> H and <sup>13</sup> C spectra of Neu5Ac7Fα2–3GalβpNP ( <b>1b</b> ).....               | S2  |
| <sup>1</sup> H and <sup>13</sup> C spectra of Neu5Ac7OMeα2–3GalβpNP ( <b>2b</b> ).....             | S3  |
| <sup>1</sup> H and <sup>13</sup> C spectra of Neu5Ac7Deoxyα2–3GalβpNP ( <b>3b</b> ).....           | S4  |
| <sup>1</sup> H and <sup>13</sup> C spectra of Neu5Ac7N <sub>3</sub> α2–3GalβpNP ( <b>4b</b> )..... | S5  |
| <sup>1</sup> H and <sup>13</sup> C spectra of Kdn7Fα2–3GalβpNP ( <b>5b</b> ).....                  | S6  |
| <sup>1</sup> H and <sup>13</sup> C spectra of Kdn7OMeα2–3GalβpNP ( <b>6b</b> ).....                | S7  |
| <sup>1</sup> H and <sup>13</sup> C spectra of Kdn7Deoxyα2–3GalβpNP ( <b>7b</b> ).....              | S8  |
| <sup>1</sup> H and <sup>13</sup> C spectra of Kdn7N <sub>3</sub> α2–3GalβpNP ( <b>8b</b> ).....    | S9  |
| <sup>1</sup> H and <sup>13</sup> C spectra of Neu5Ac7Fα2–6GalβpNP ( <b>1c</b> ).....               | S10 |
| <sup>1</sup> H and <sup>13</sup> C spectra of Neu5Ac7OMeα2–6GalβpNP ( <b>2c</b> ).....             | S11 |
| <sup>1</sup> H and <sup>13</sup> C spectra of Neu5Ac7Deoxyα2–6GalβpNP ( <b>3c</b> ).....           | S12 |
| <sup>1</sup> H and <sup>13</sup> C spectra of Neu5Ac7N <sub>3</sub> α2–6GalβpNP ( <b>4c</b> )..... | S13 |
| <sup>1</sup> H and <sup>13</sup> C spectra of Kdn7Fα2–6GalβpNP ( <b>5c</b> ).....                  | S14 |
| <sup>1</sup> H and <sup>13</sup> C spectra of Kdn7OMeα2–6GalβpNP ( <b>6c</b> ).....                | S15 |
| <sup>1</sup> H and <sup>13</sup> C spectra of Kdn7Deoxyα2–6GalβpNP ( <b>7c</b> ).....              | S16 |
| <sup>1</sup> H and <sup>13</sup> C spectra of Kdn7N <sub>3</sub> α2–6GalβpNP ( <b>8c</b> ).....    | S17 |

$^1\text{H}$  and  $^{13}\text{C}$  spectra of Compound **1b**, Neu5Ac7F $\alpha$ 2-3Gal $\beta$ pNP

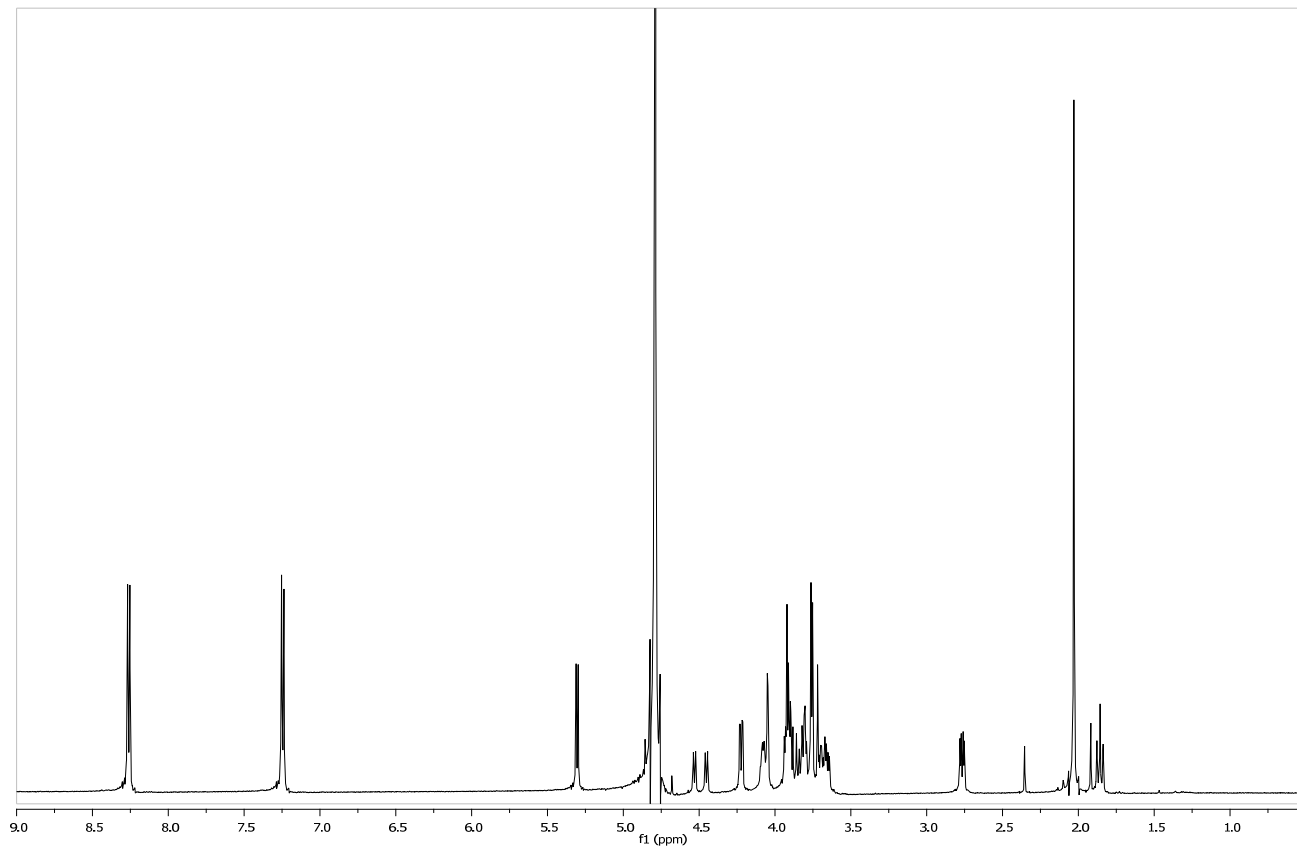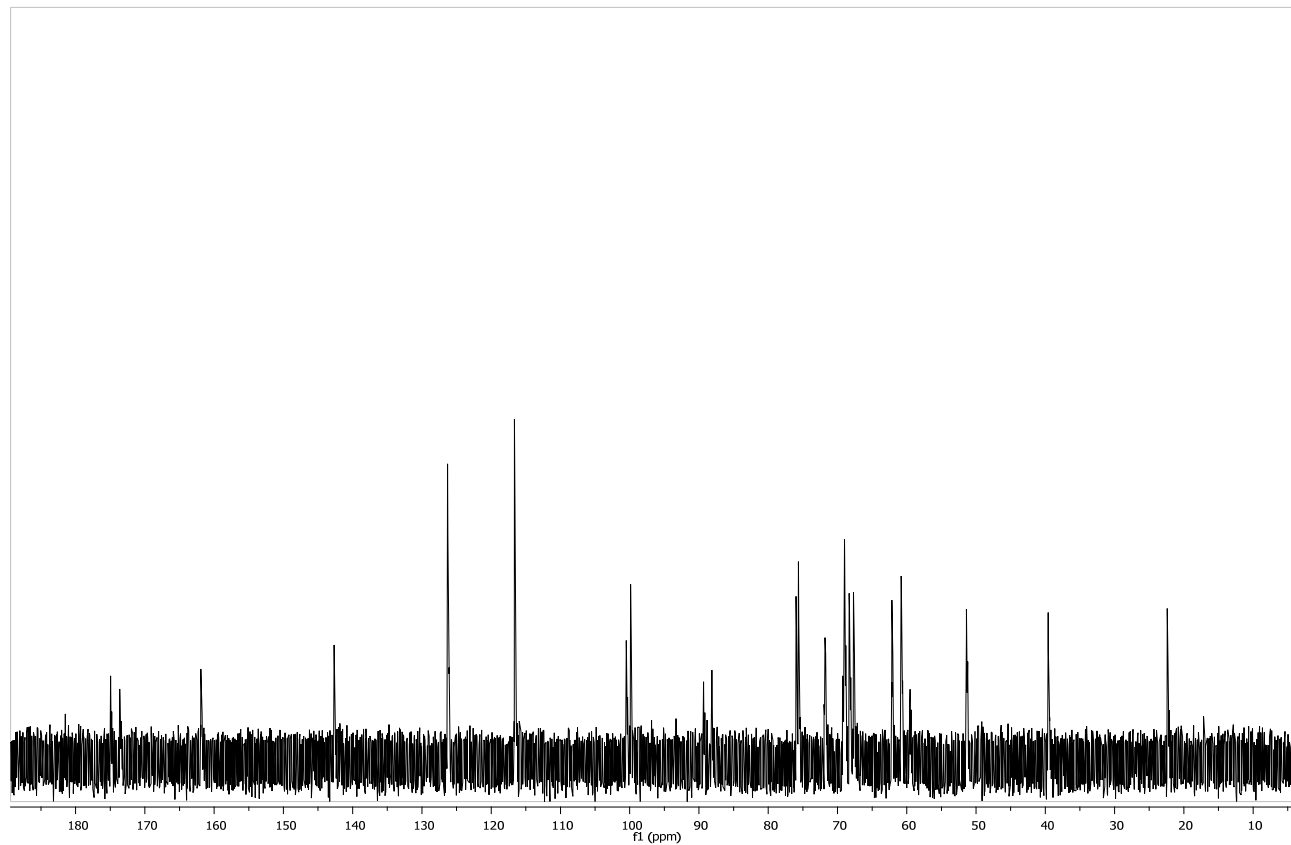

$^1\text{H}$  and  $^{13}\text{C}$  spectra of Compound **2b**, Neu5Ac7OMe $\alpha$ 2-3Gal $\beta$ pNP

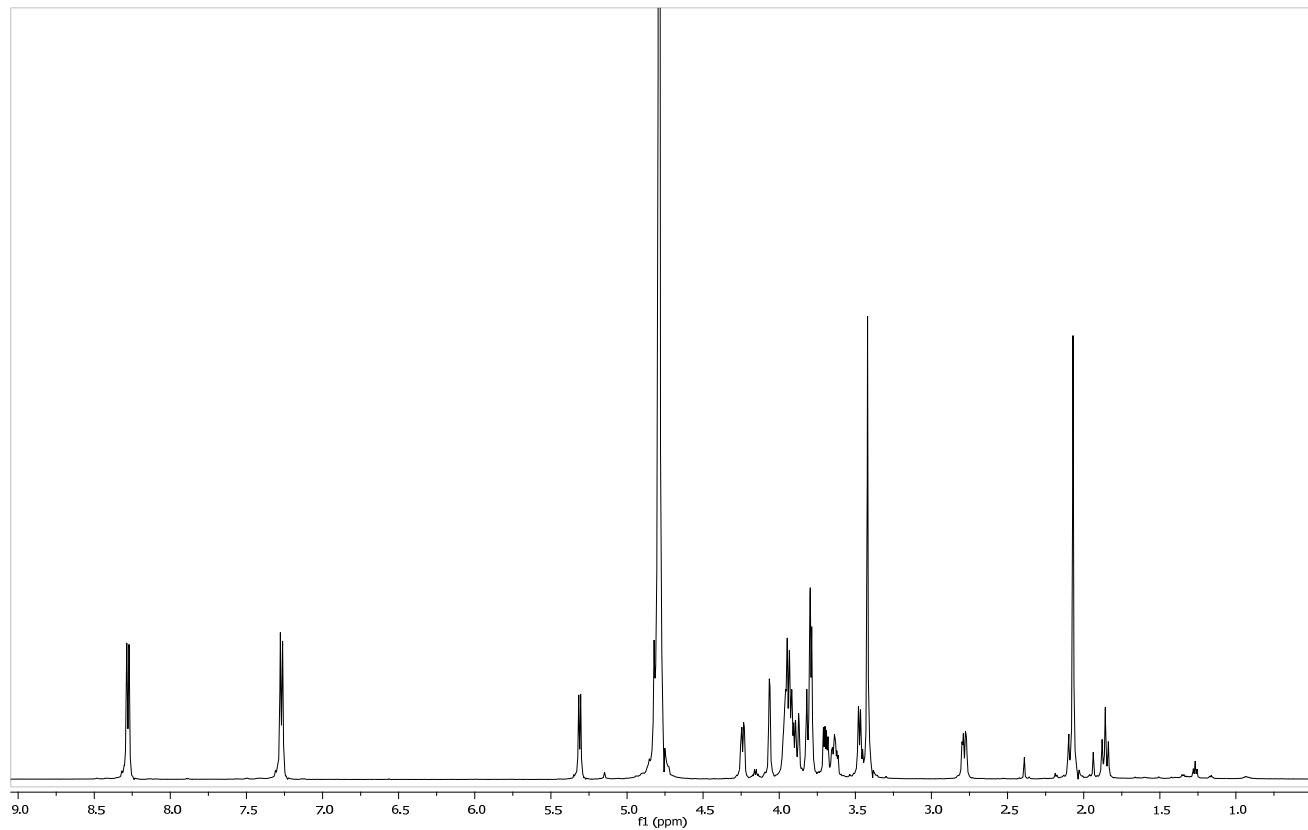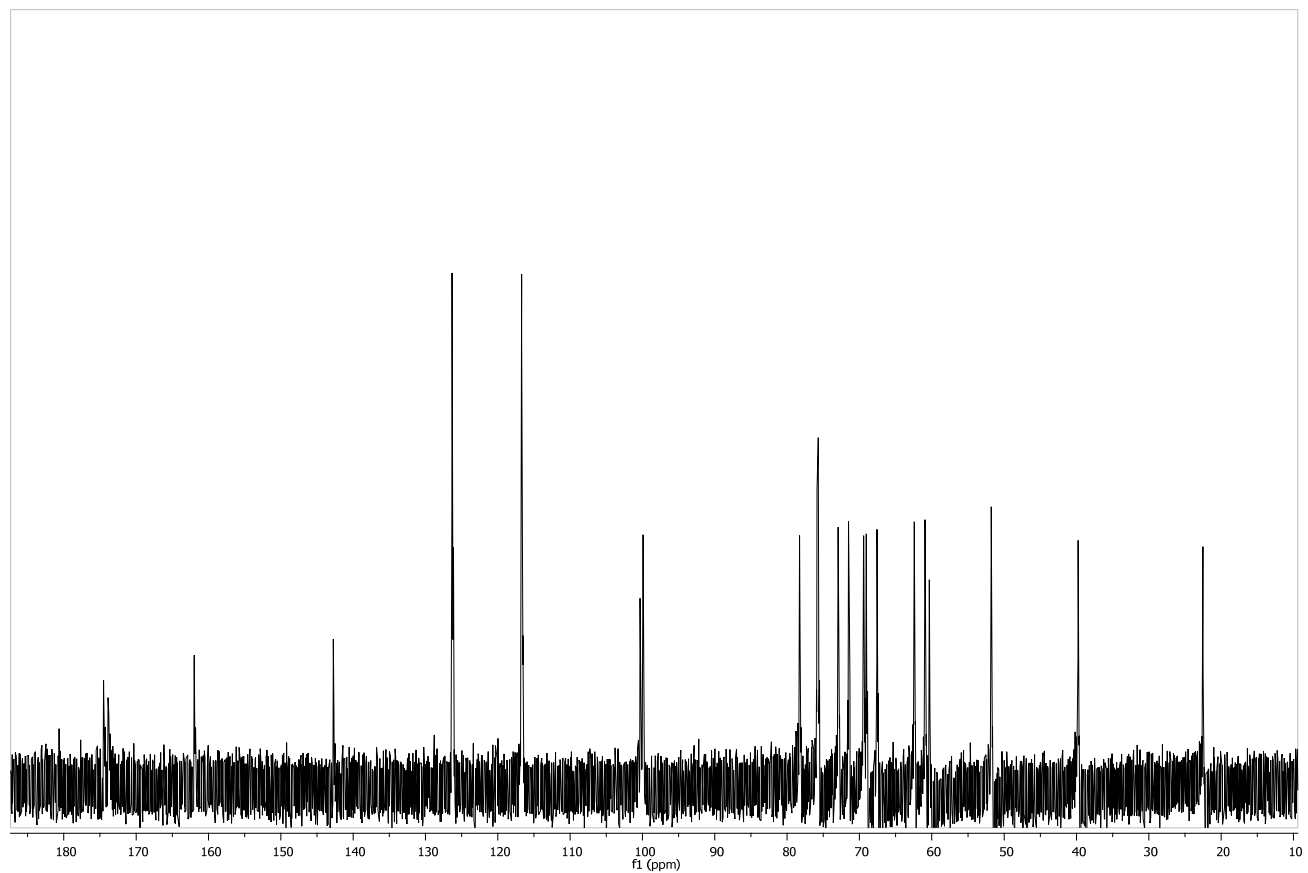

$^1\text{H}$  and  $^{13}\text{C}$  spectra of Compound **3b**, Neu5Ac7Deoxy $\alpha$ 2-3Gal $\beta$ pNP

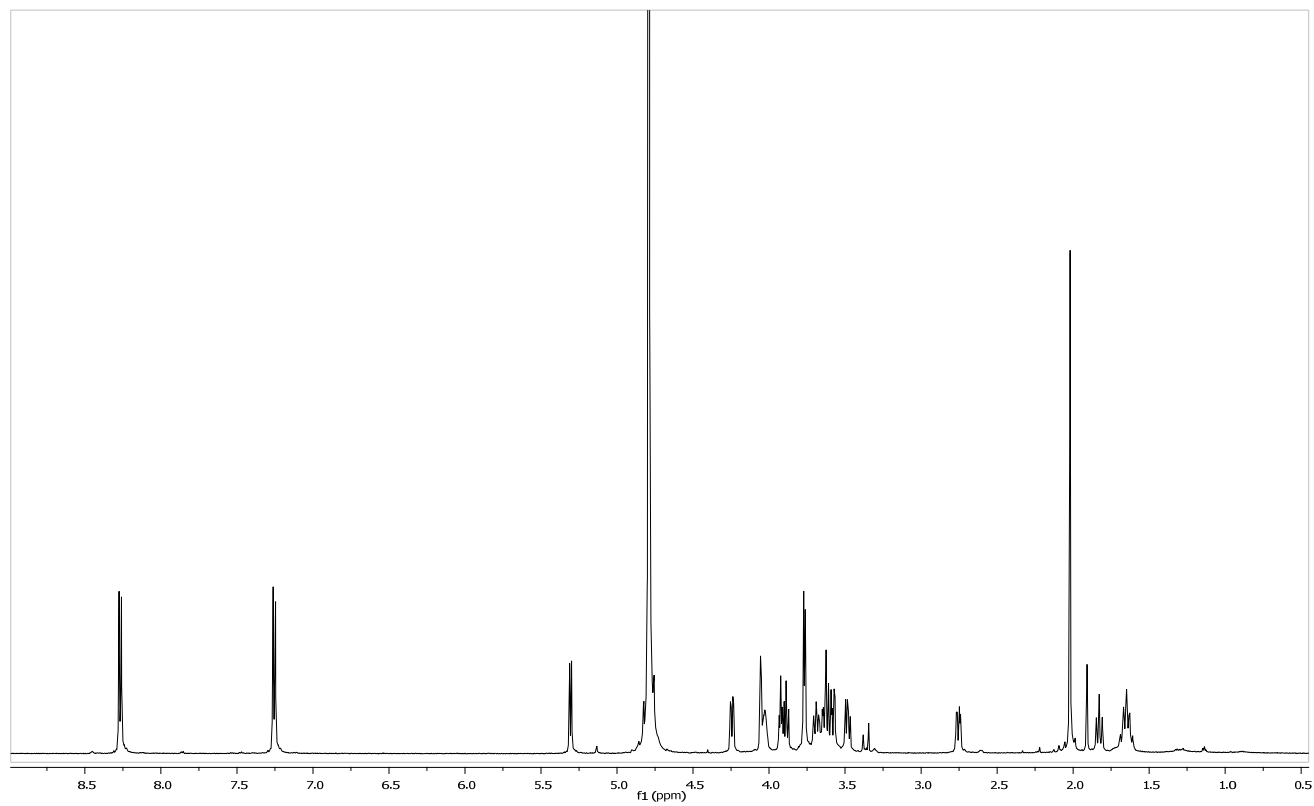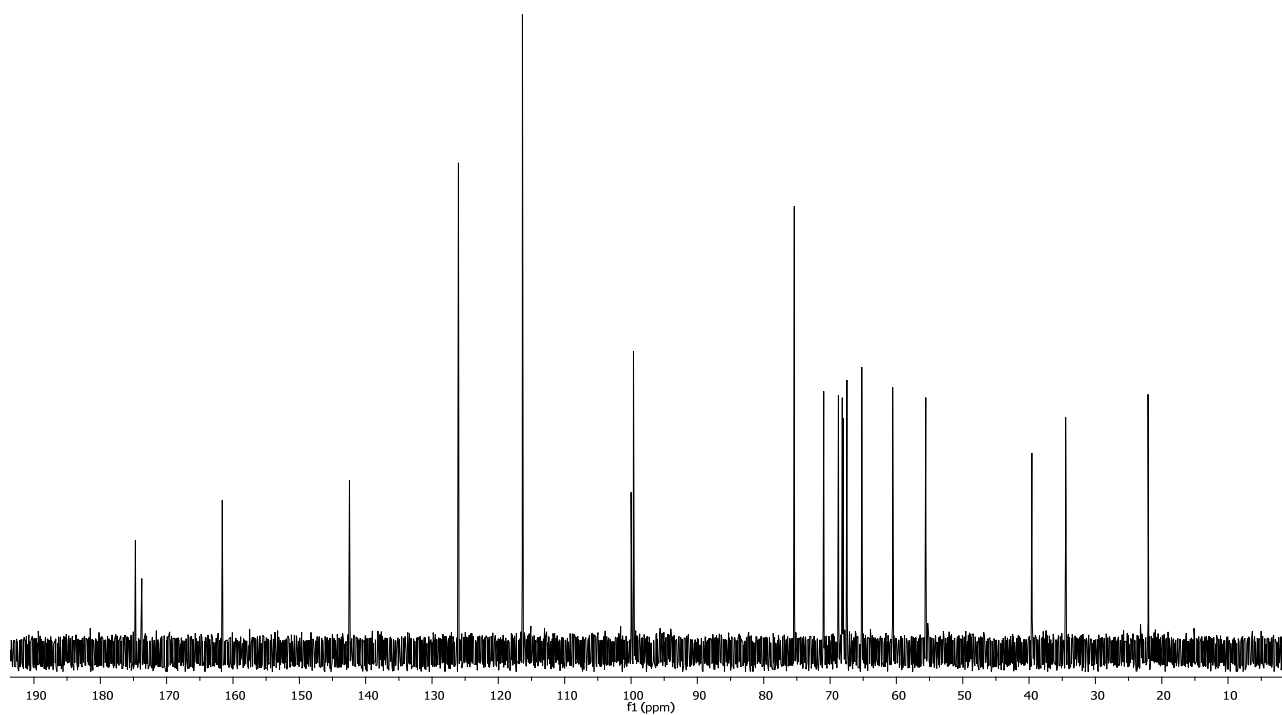

$^1\text{H}$  and  $^{13}\text{C}$  spectra of Compound **4b**, Neu5Ac7N<sub>3</sub> $\alpha$ 2-3Gal $\beta$ pNP

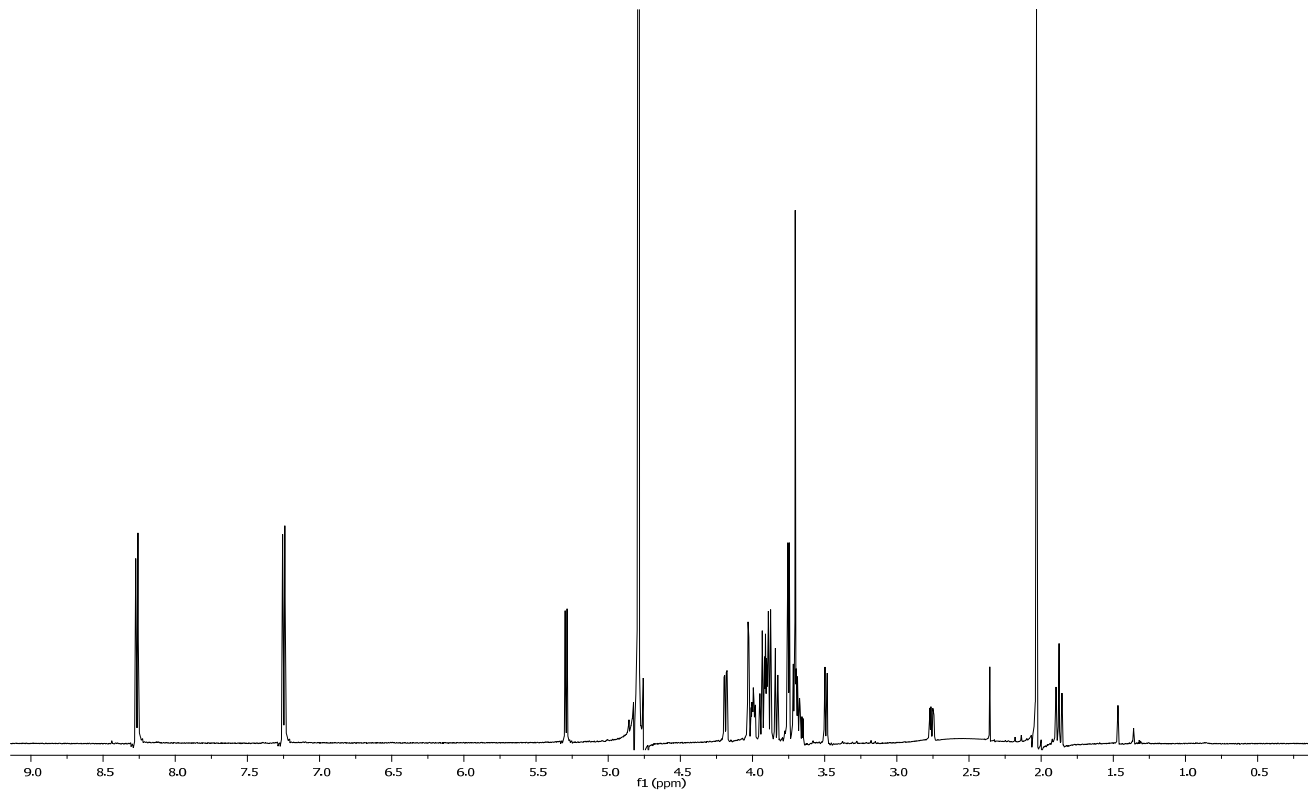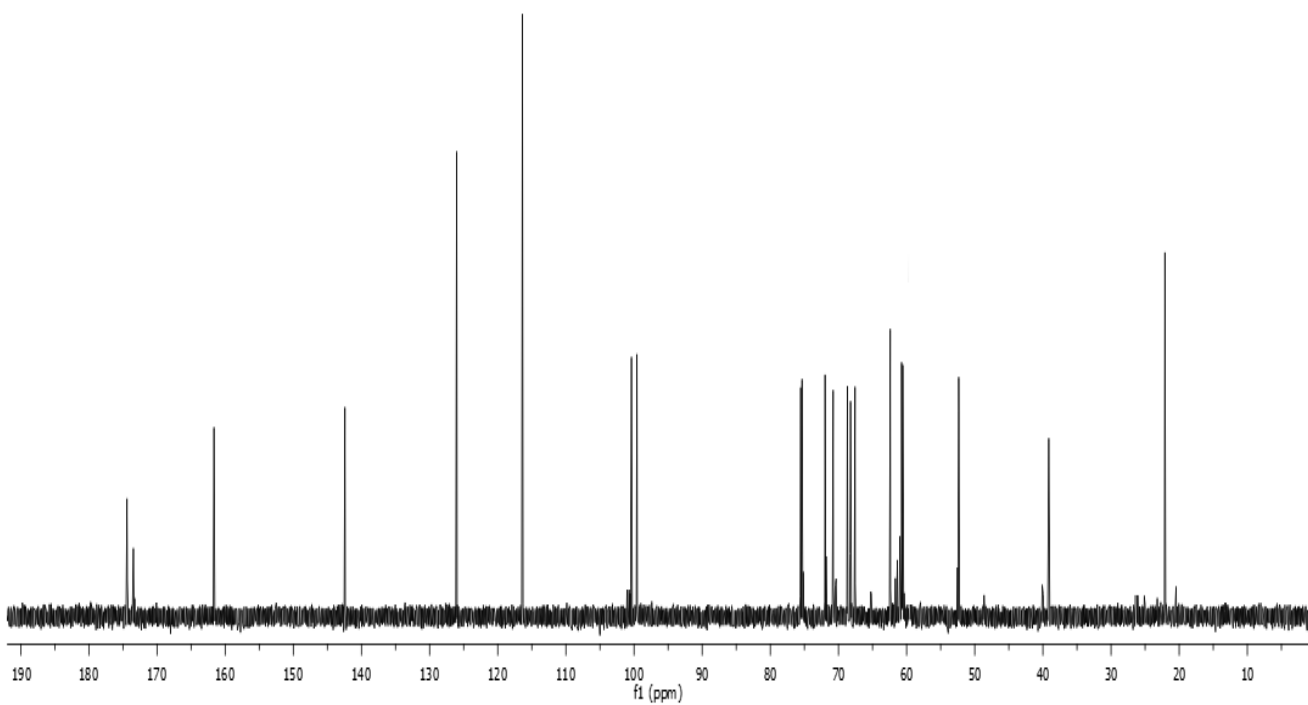

$^1\text{H}$  and  $^{13}\text{C}$  spectra of Compound **5b**, Kdn7F $\alpha$ 2-3Gal $\beta$ pNP

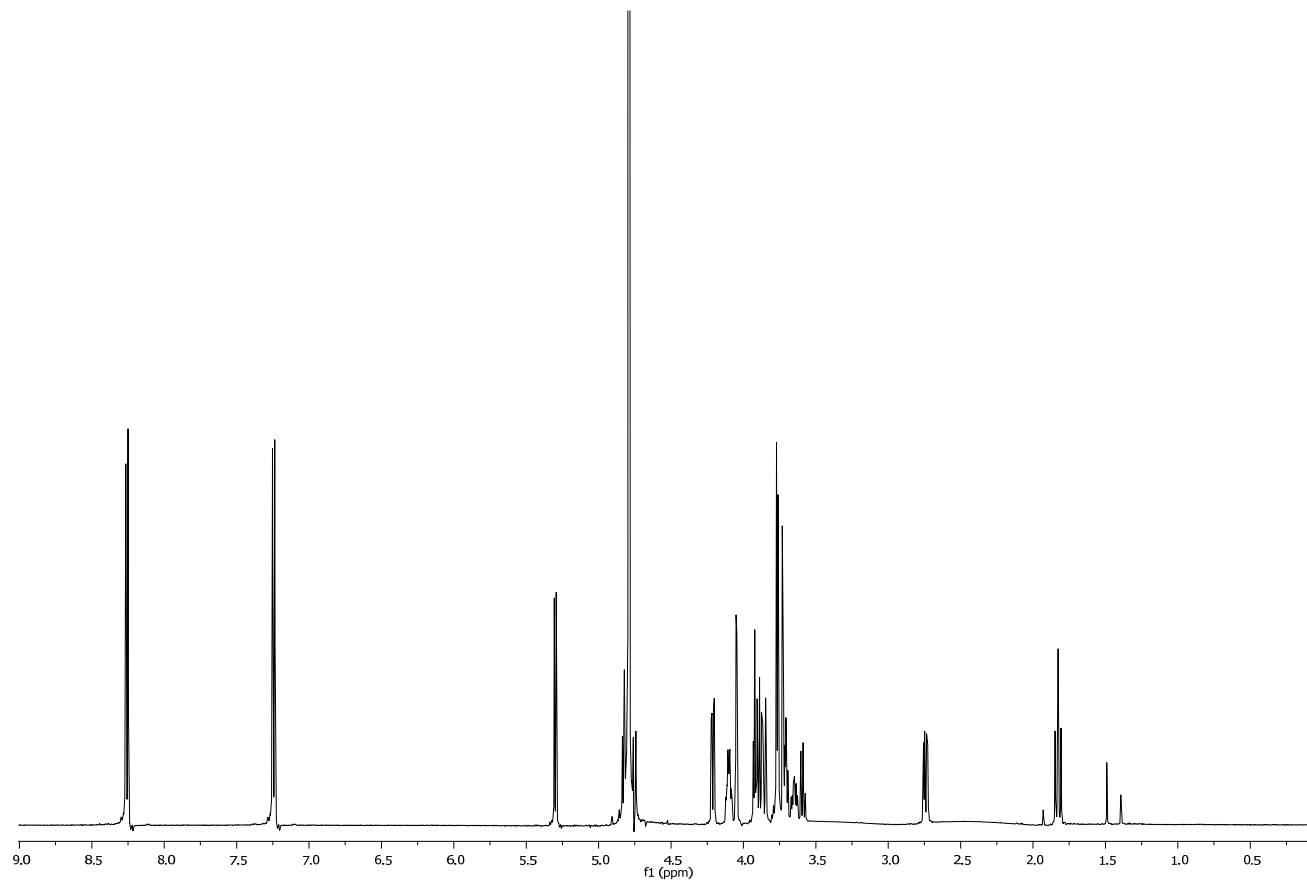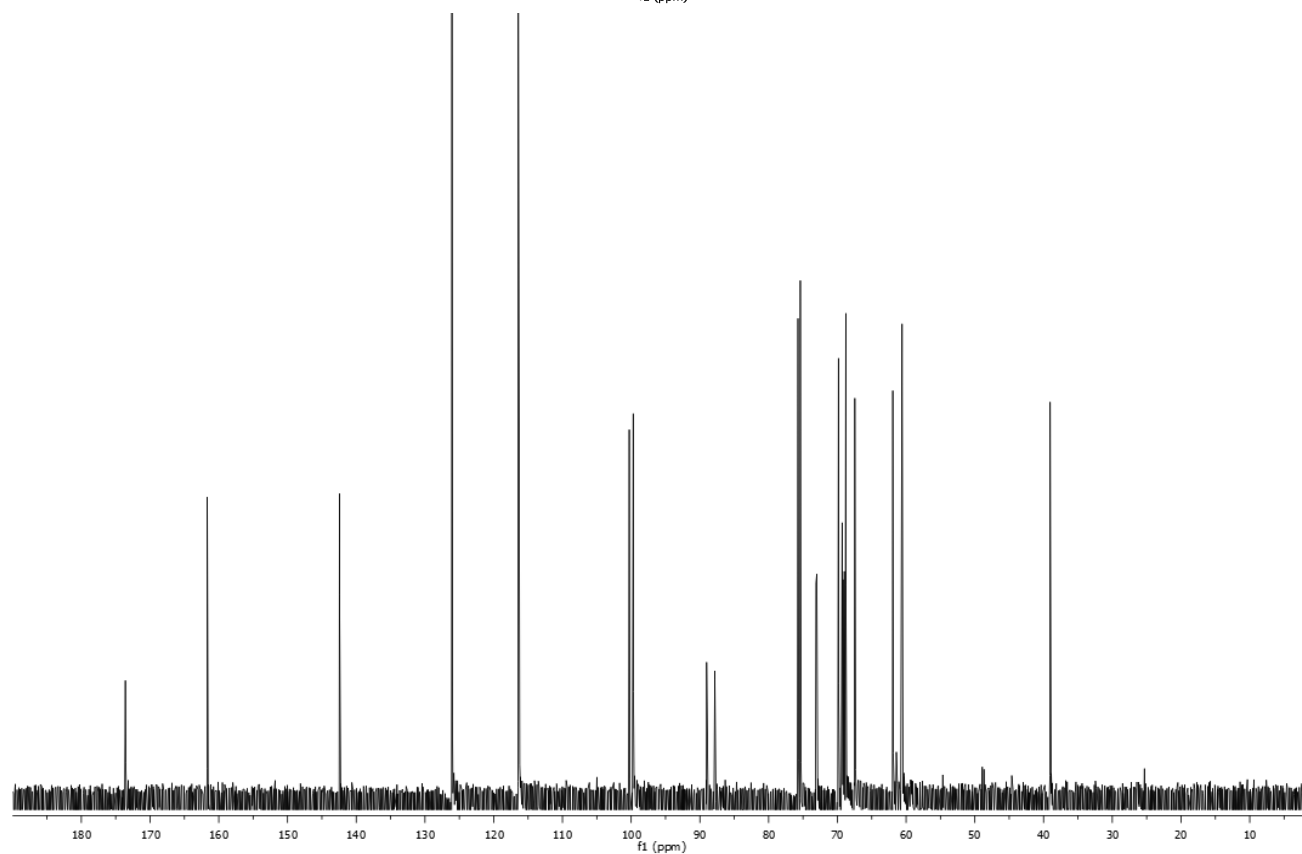

$^1\text{H}$  and  $^{13}\text{C}$  spectra of Compound **6b**, Kdn7OMec $\alpha$ 2-3Gal $\beta$ pNP

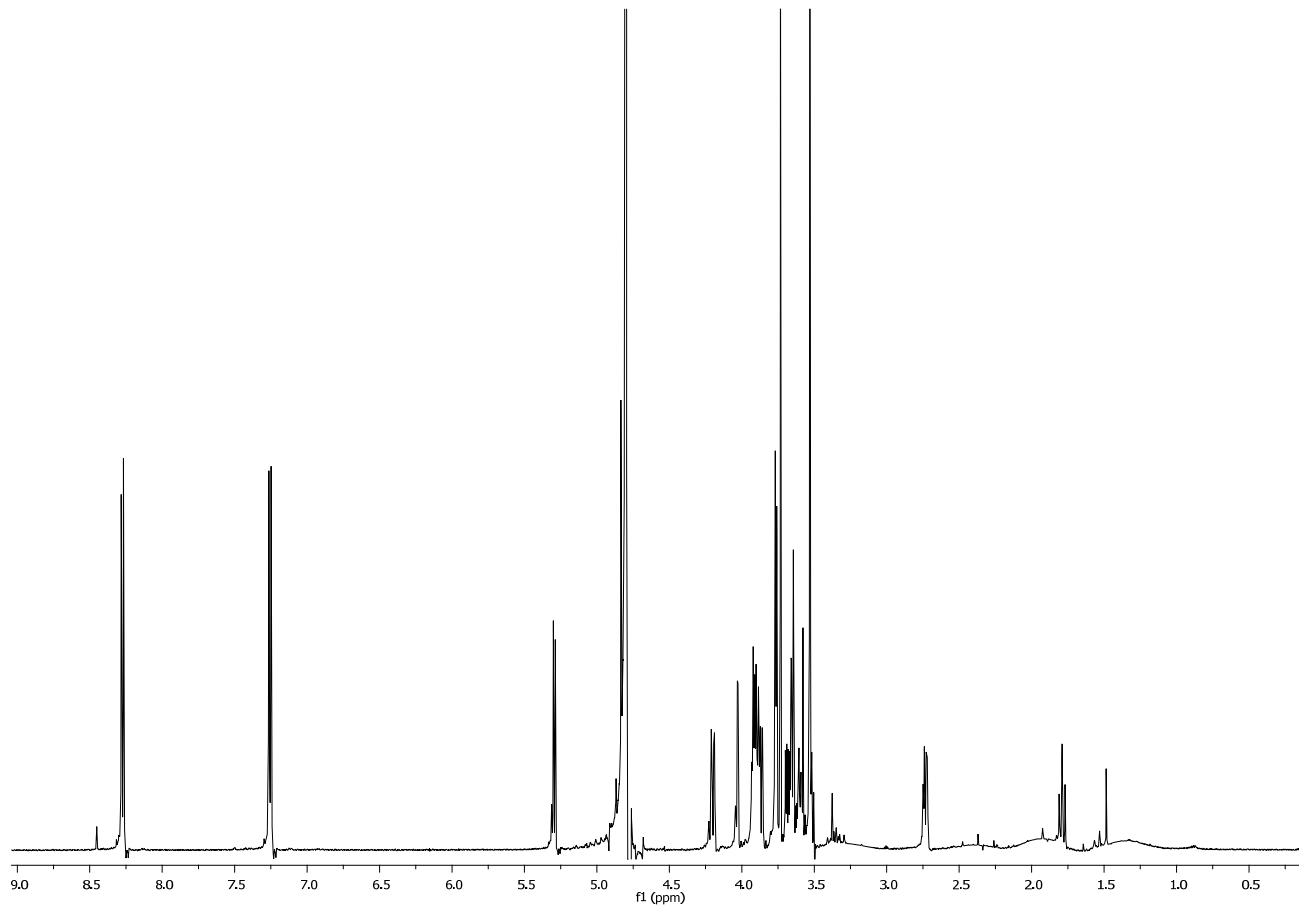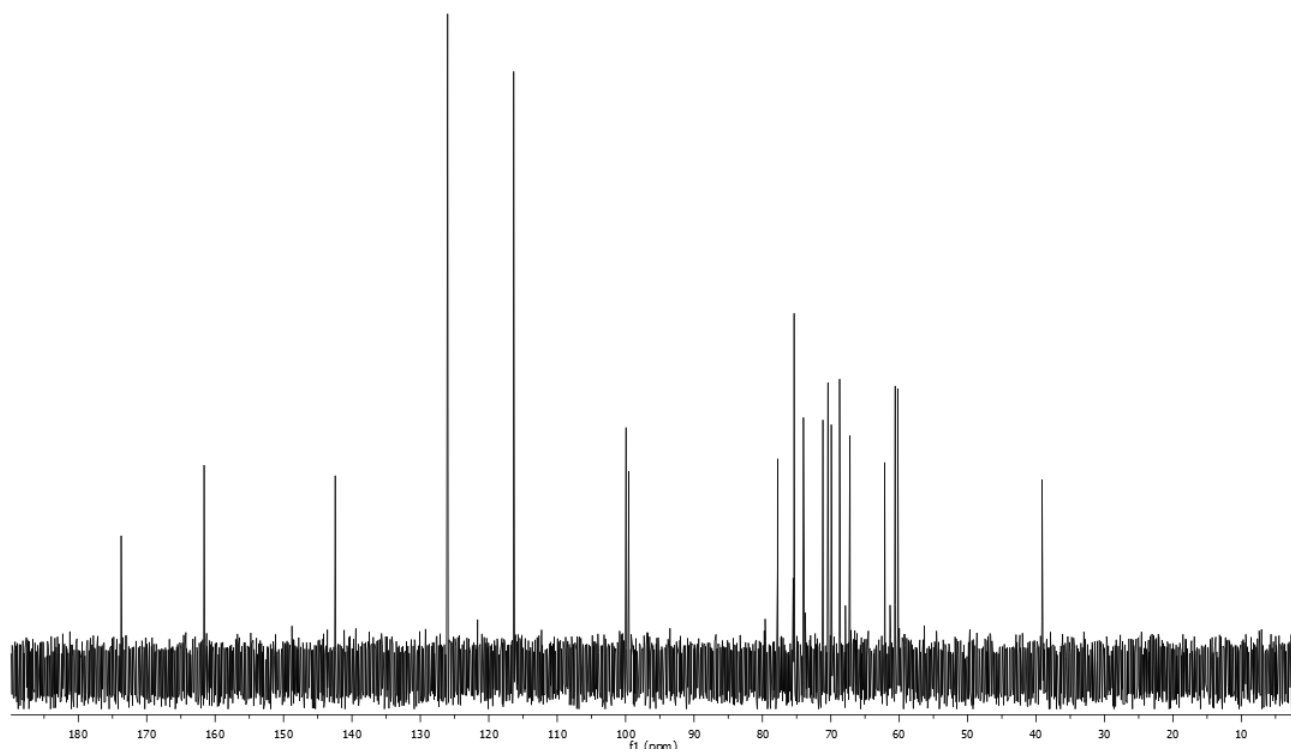

$^1\text{H}$  and  $^{13}\text{C}$  spectra of Compound **7b**, Kdn7Deoxy $\alpha$ 2-3Gal $\beta$ pNP

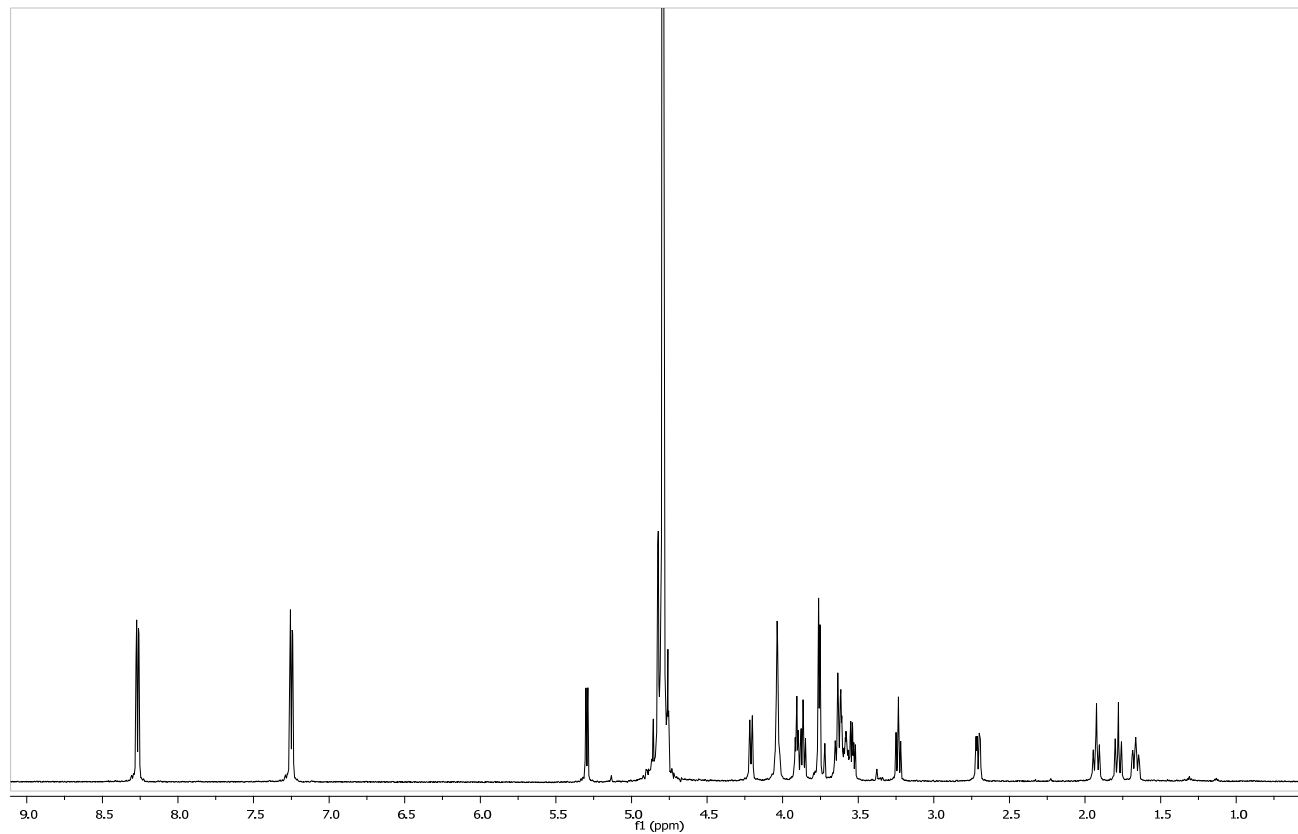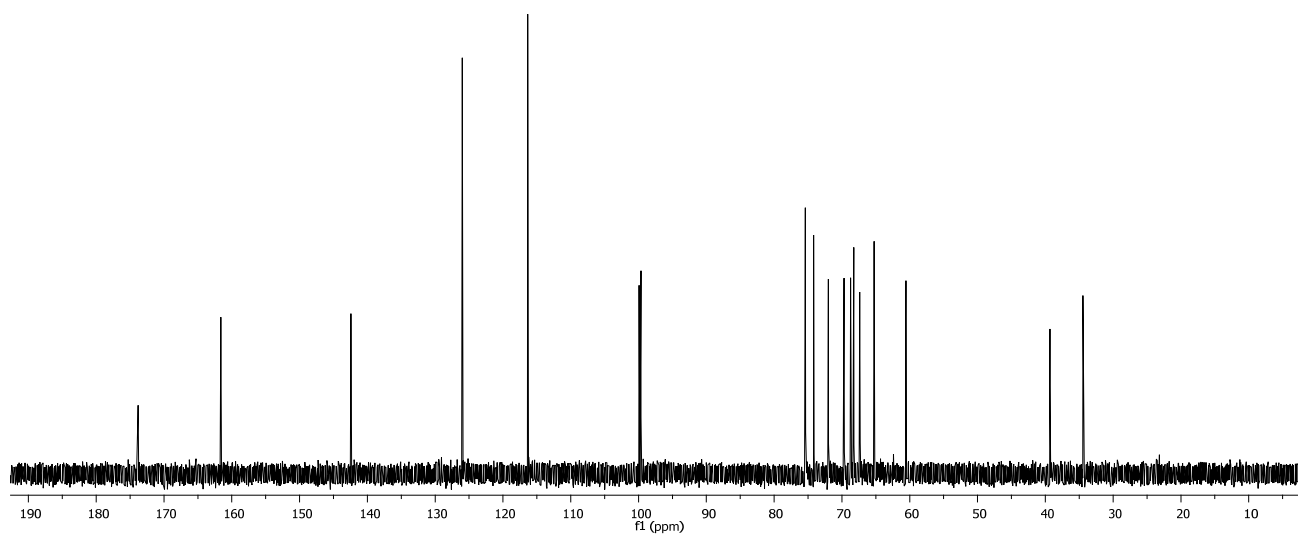



$^1\text{H}$  and  $^{13}\text{C}$  spectra of Compound **8b**, Kdn7N $_3\alpha$ 2-3Gal $\beta$ pNP

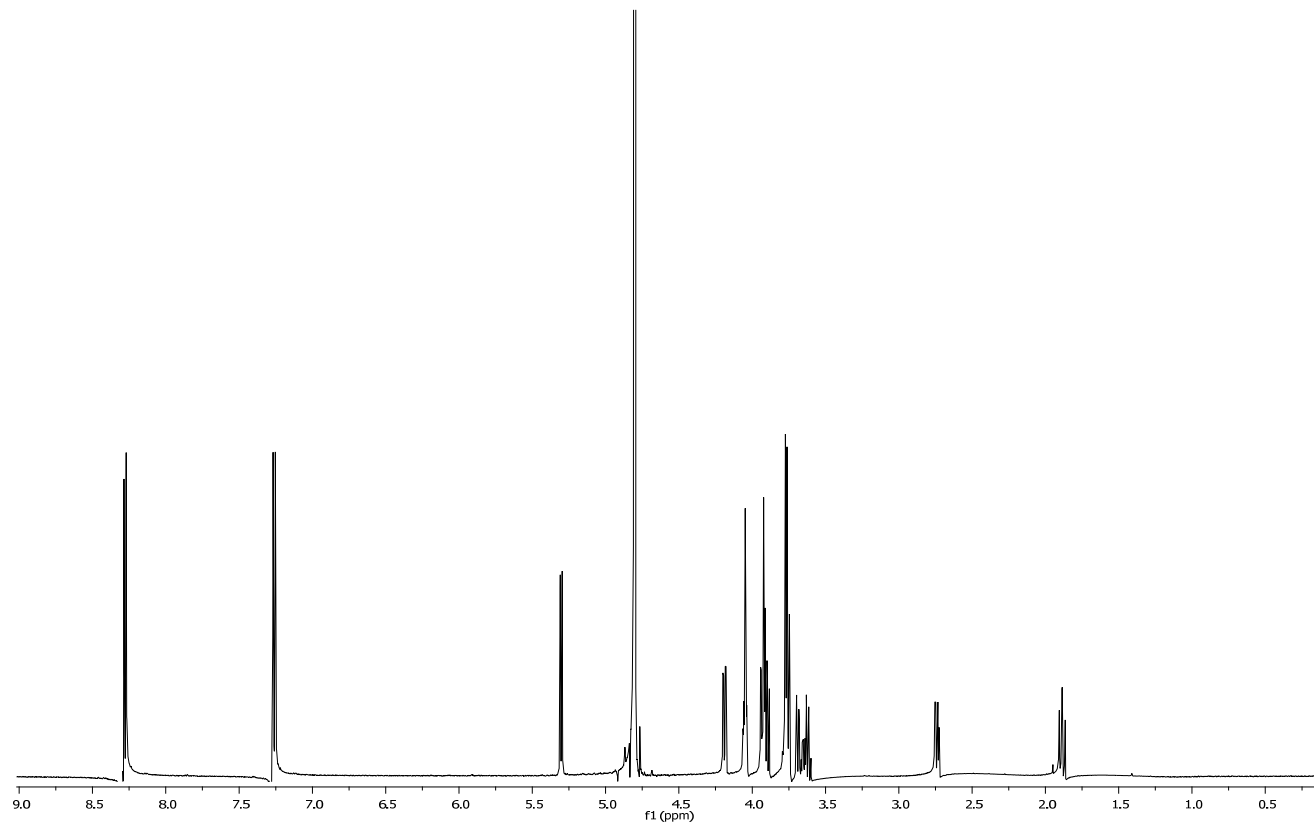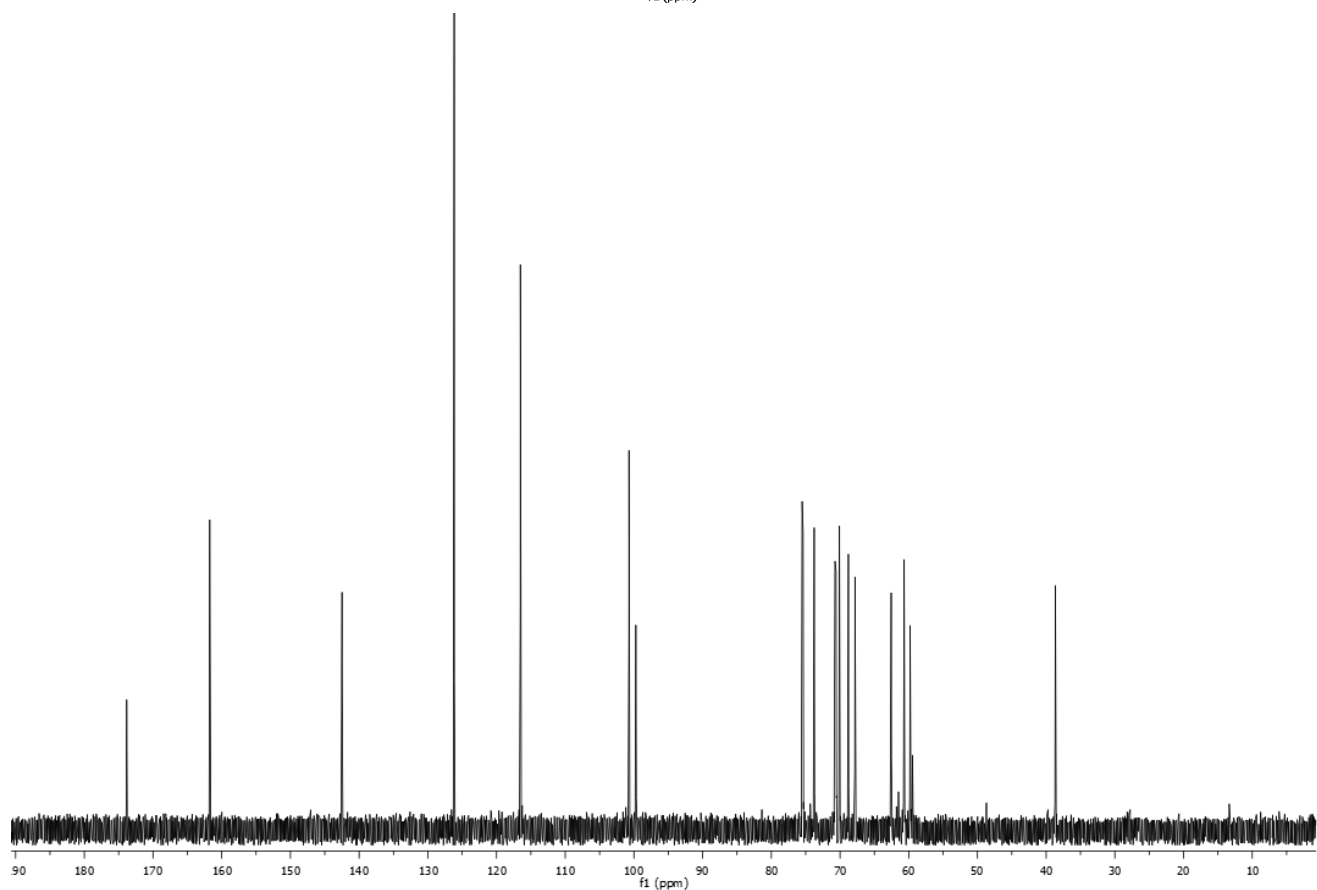

$^1\text{H}$  and  $^{13}\text{C}$  spectra of Compound **1c**, Neu5Ac7F $\alpha$ 2-6Gal $\beta$ pNP

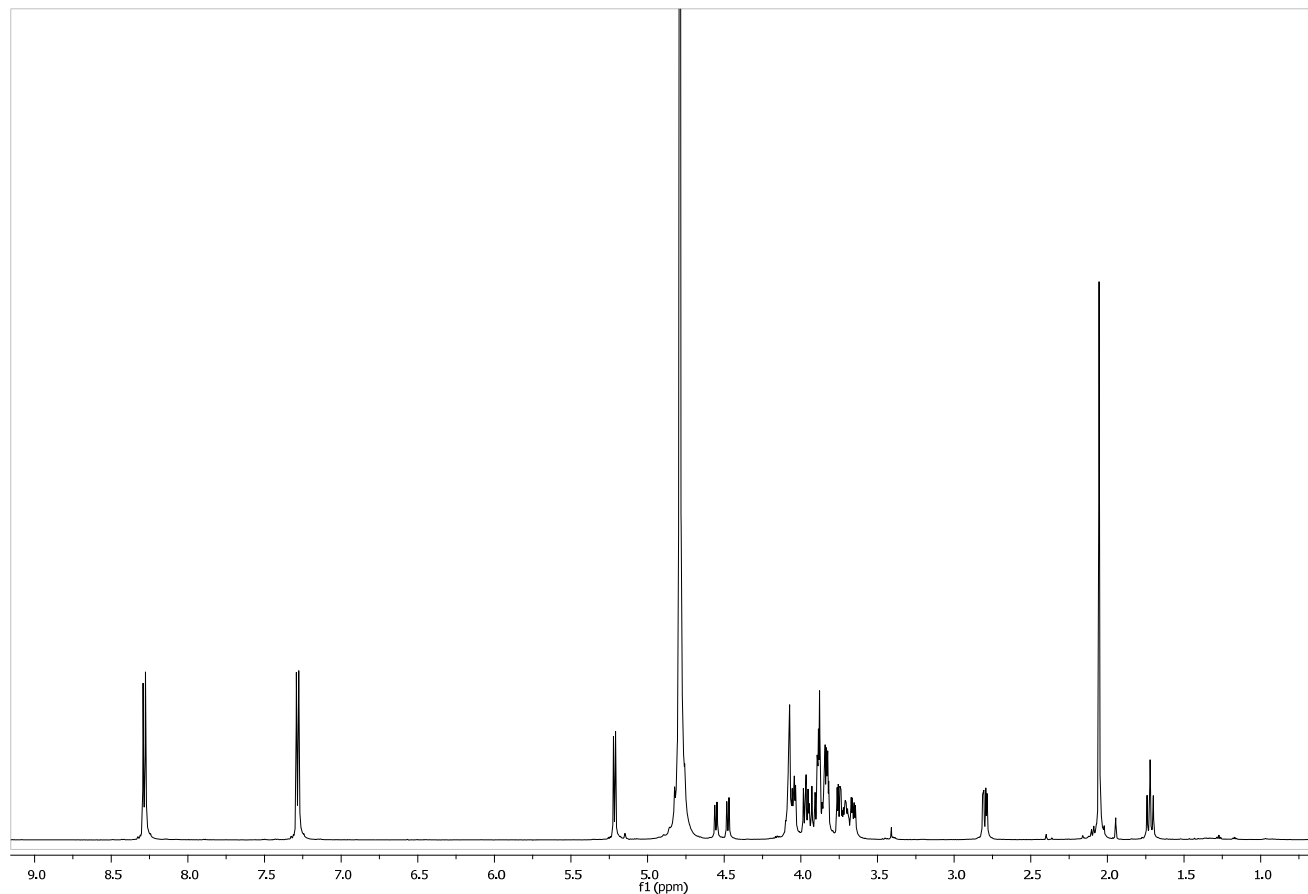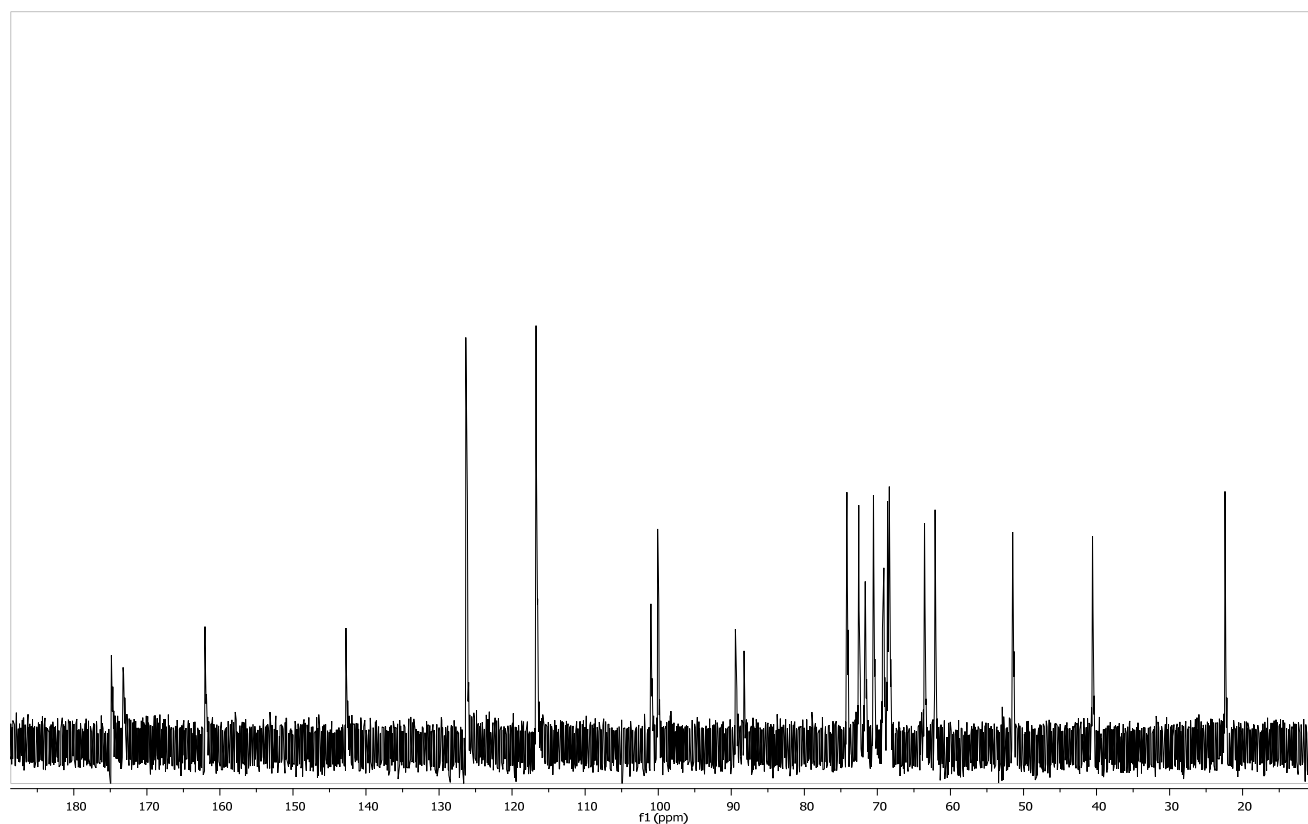

$^1\text{H}$  and  $^{13}\text{C}$  spectra of Compound **2c**, Neu5Ac7OMe $\alpha$ 2-6Gal $\beta$ pNP

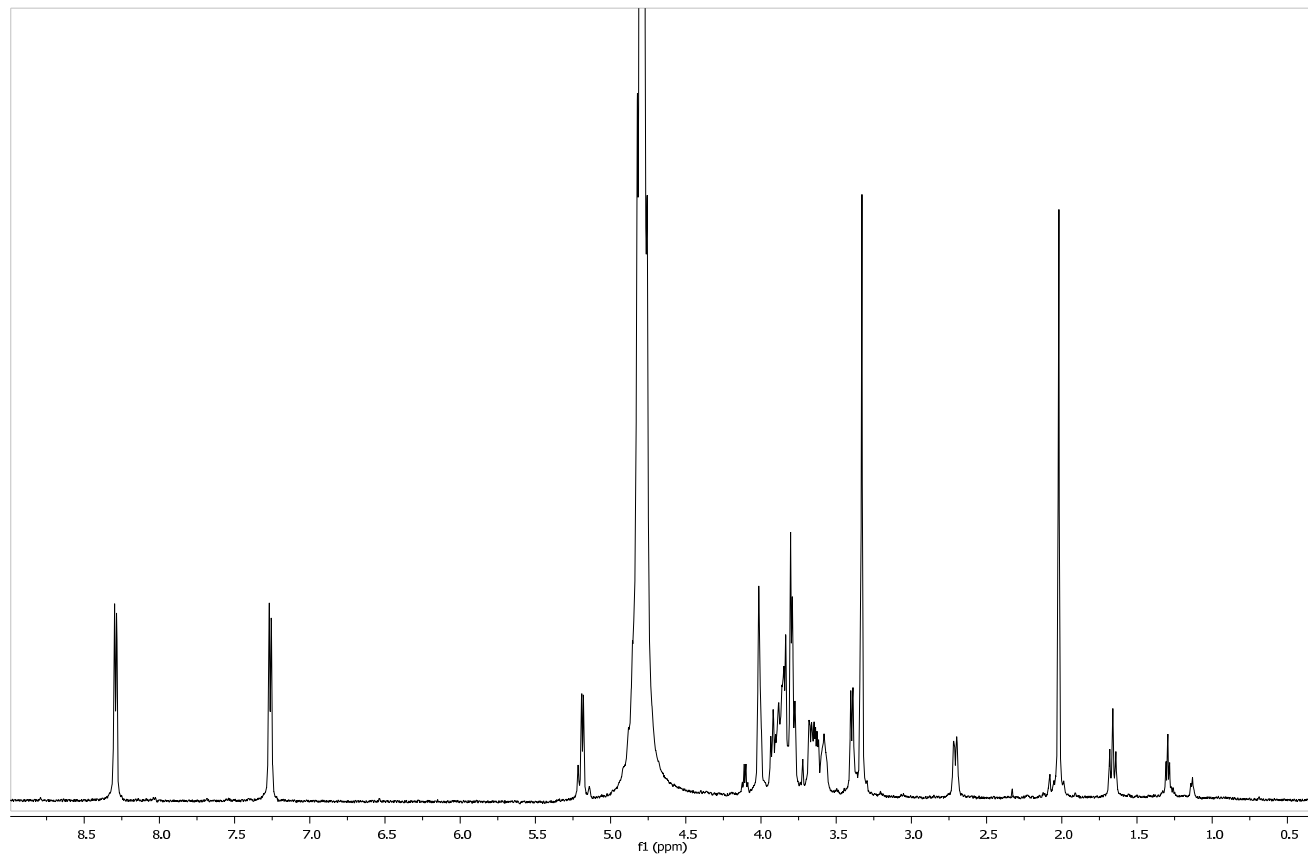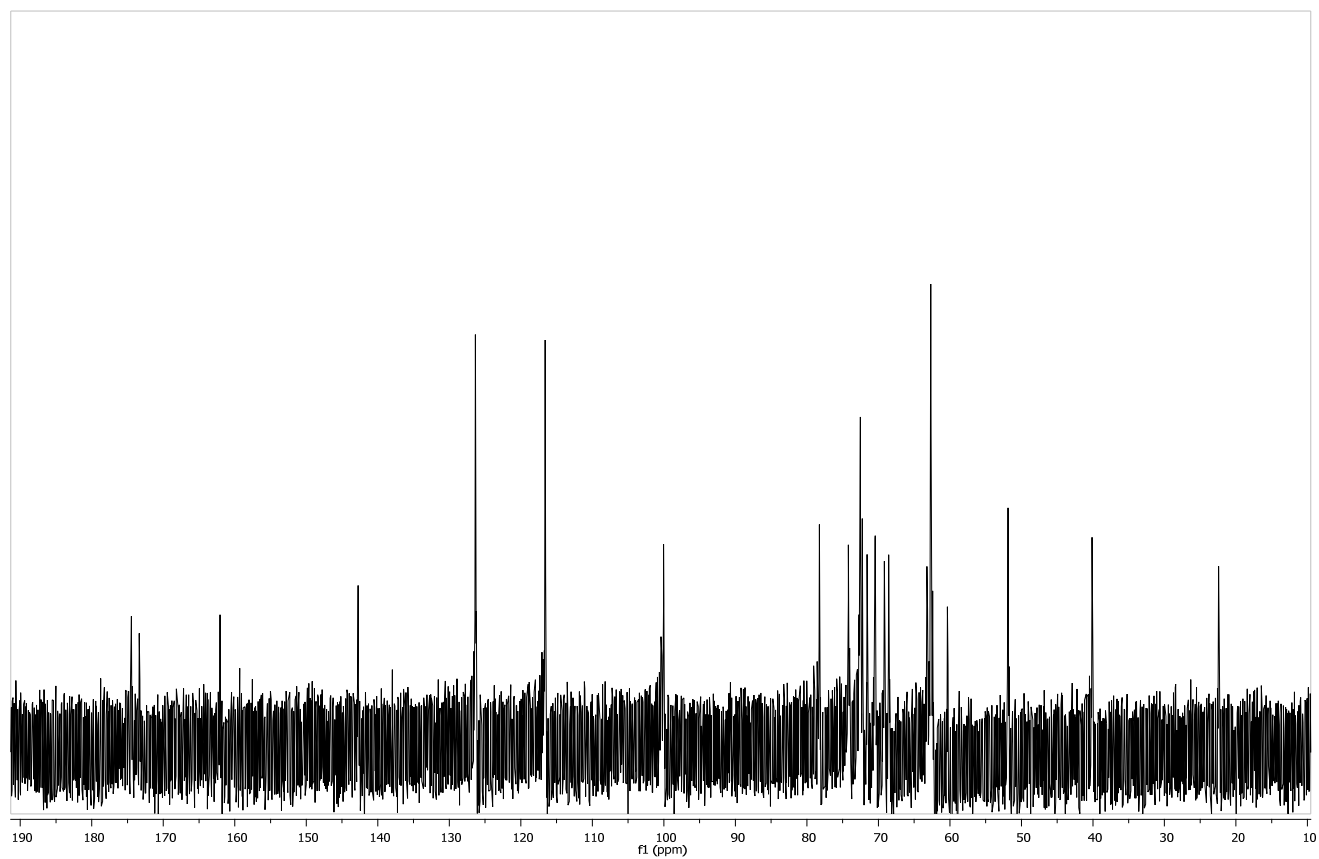

$^1\text{H}$  and  $^{13}\text{C}$  spectra of Compound **3c**, Neu5Ac7Deoxy $\alpha$ 2-6Gal $\beta$ pNP

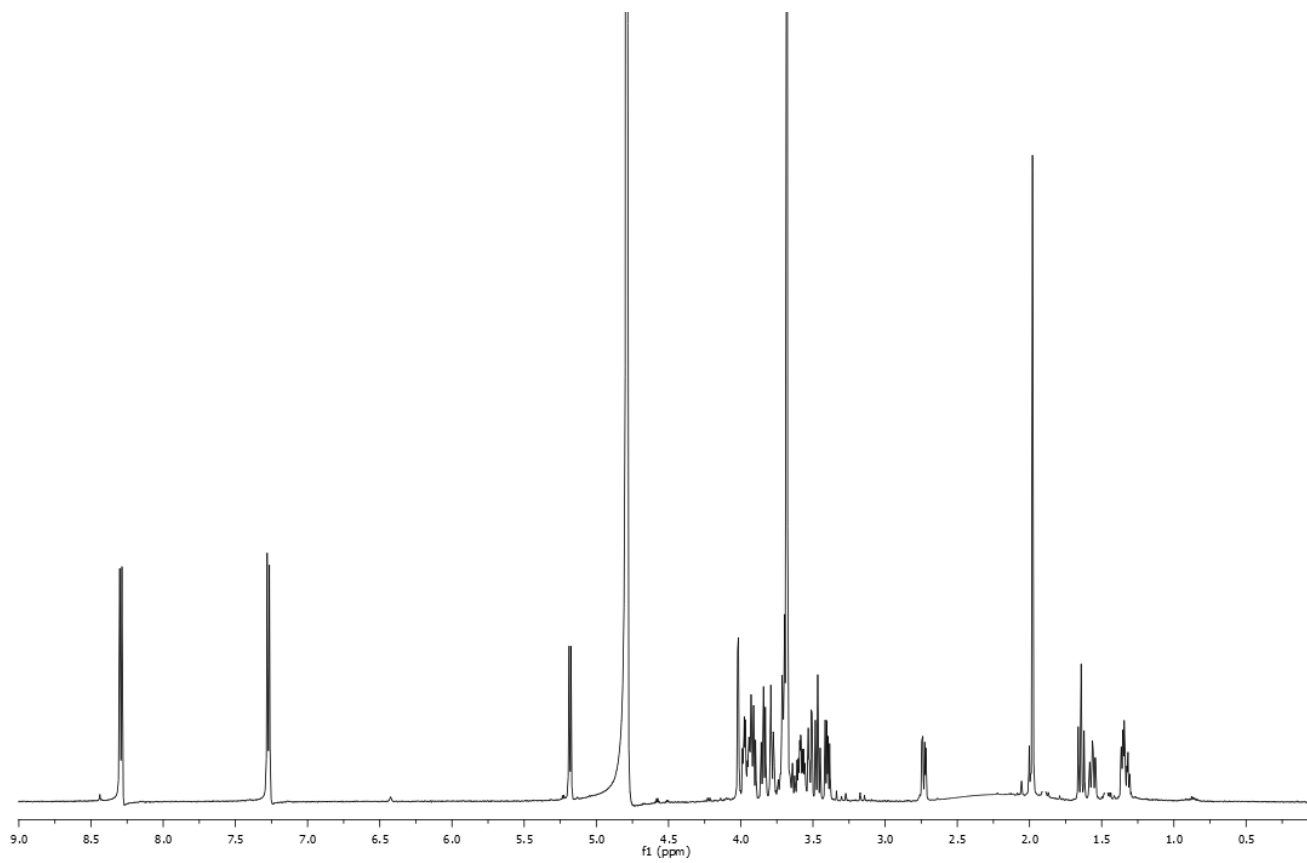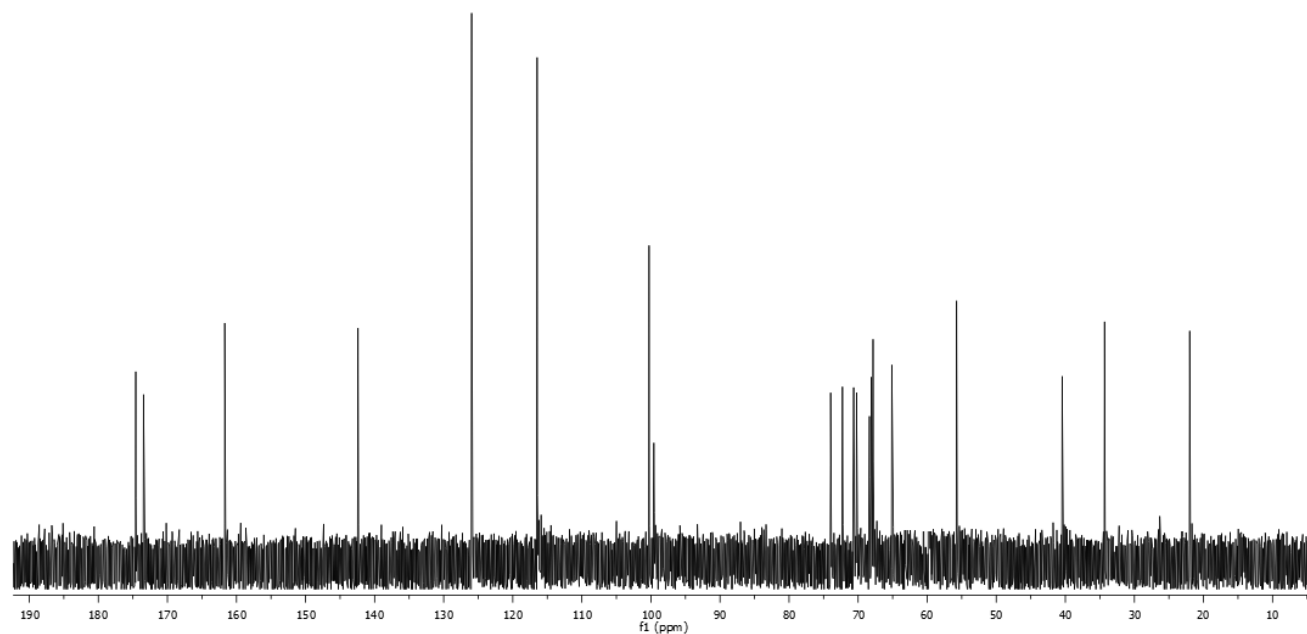

$^1\text{H}$  and  $^{13}\text{C}$  spectra of Compound **4c**, Neu5Ac7N $_3\alpha$ 2-6Gal $\beta$ pNP

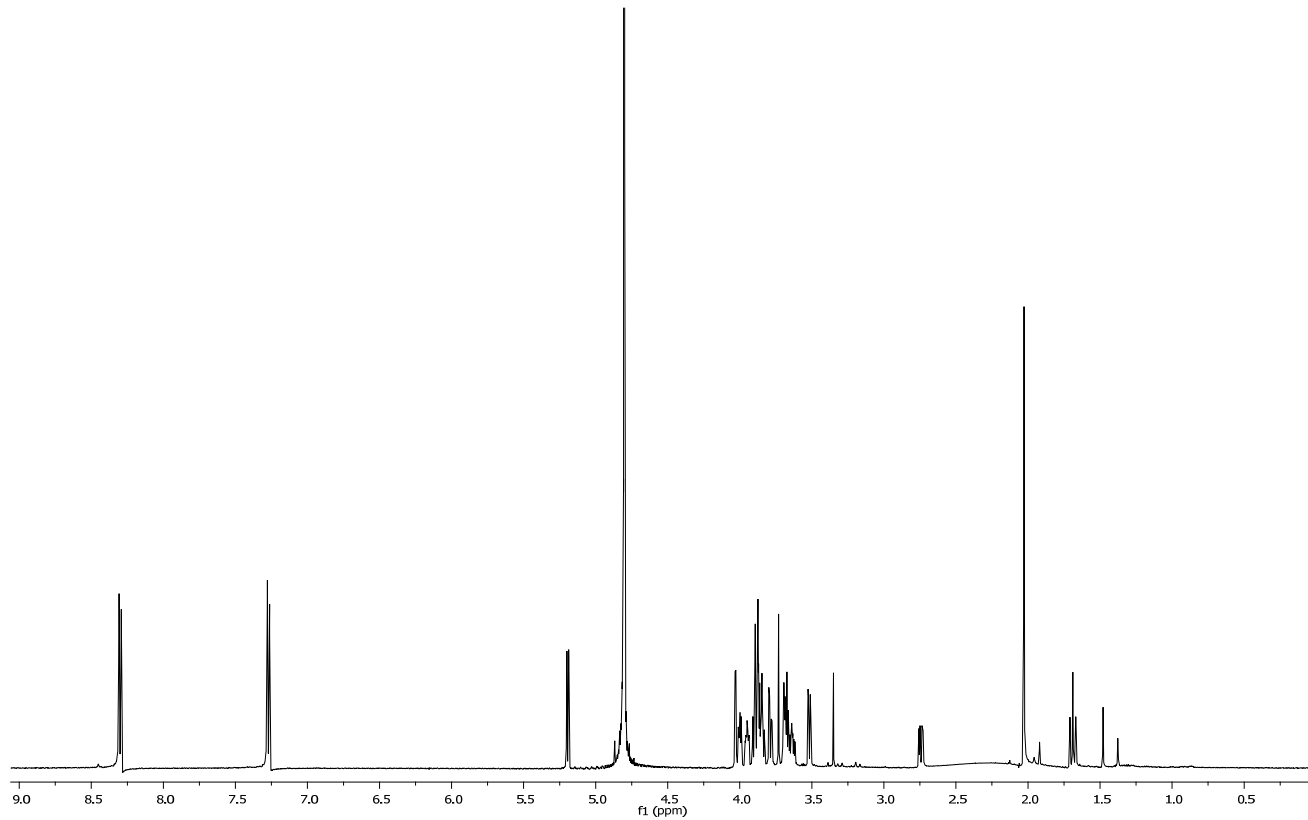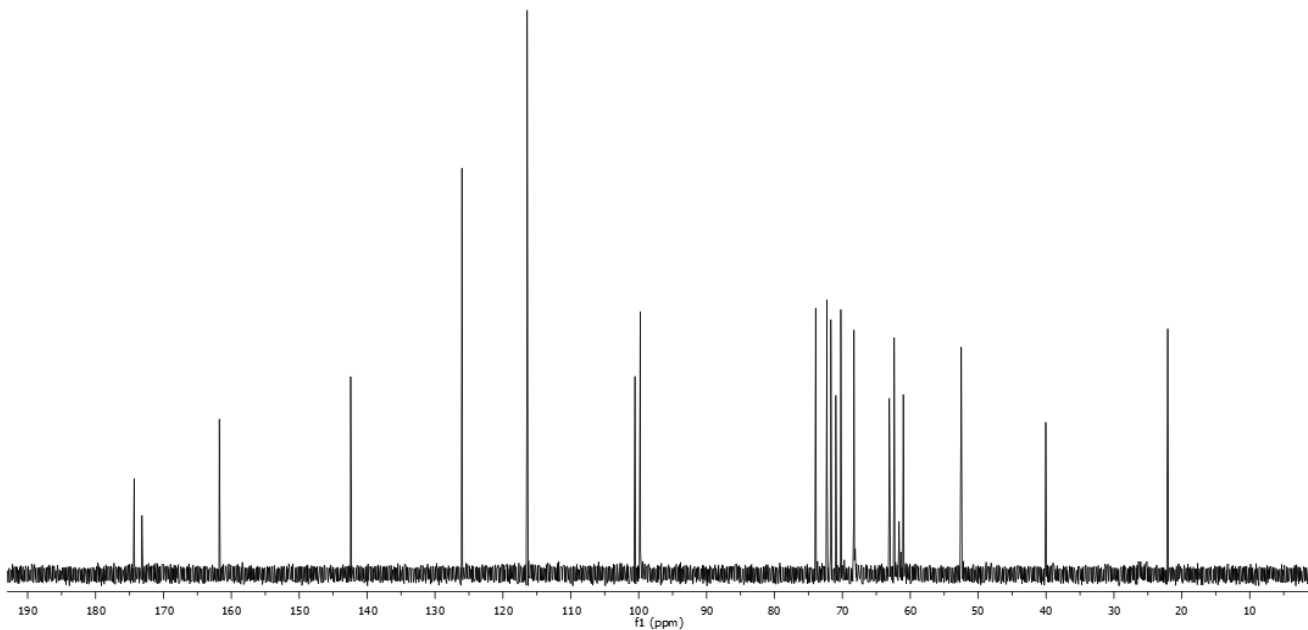

$^1\text{H}$  and  $^{13}\text{C}$  spectra of Compound **5c**, Kdn7F $\alpha$ 2-6Gal $\beta$ pNP

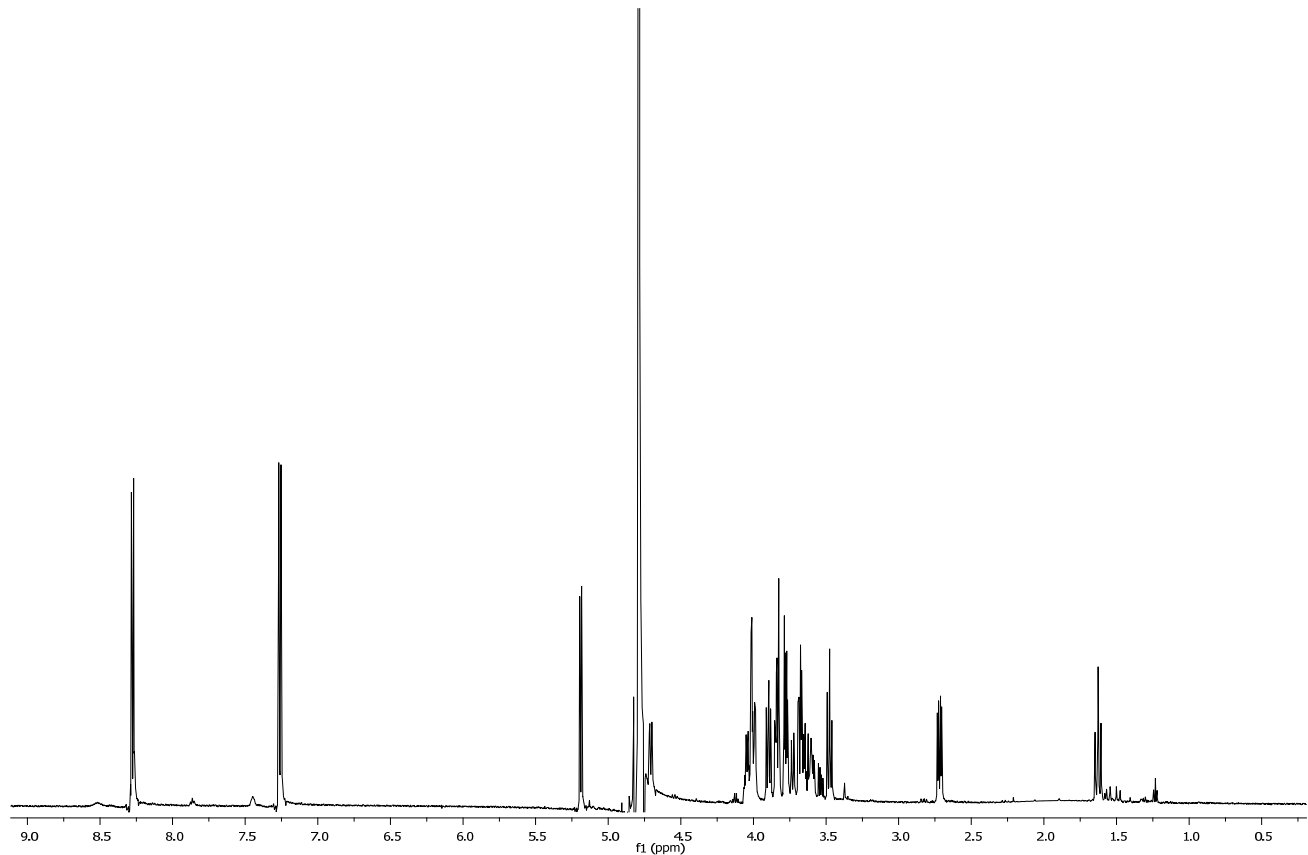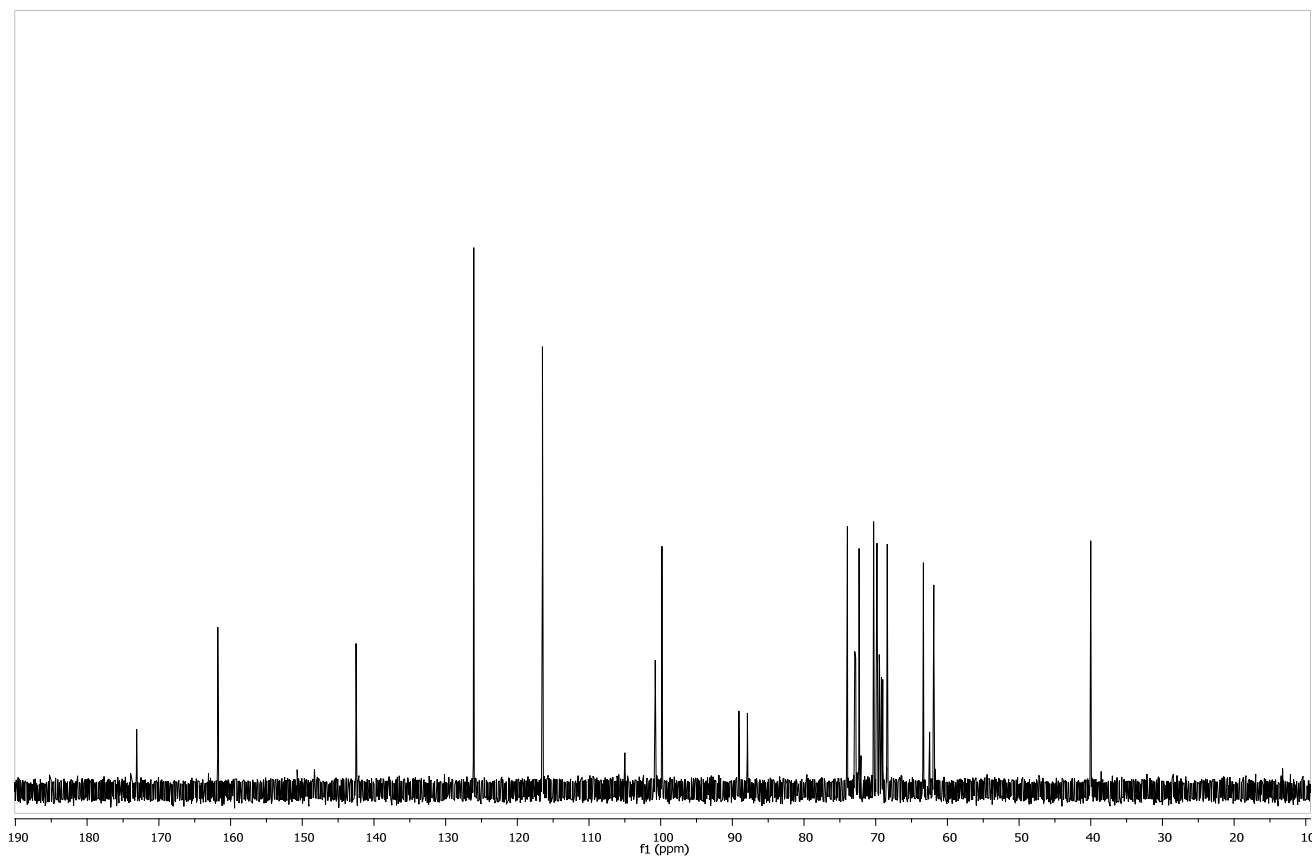

$^1\text{H}$  and  $^{13}\text{C}$  spectra of Compound **6c**, Kdn7OMe $\alpha$ 2-6Gal $\beta$ pNP

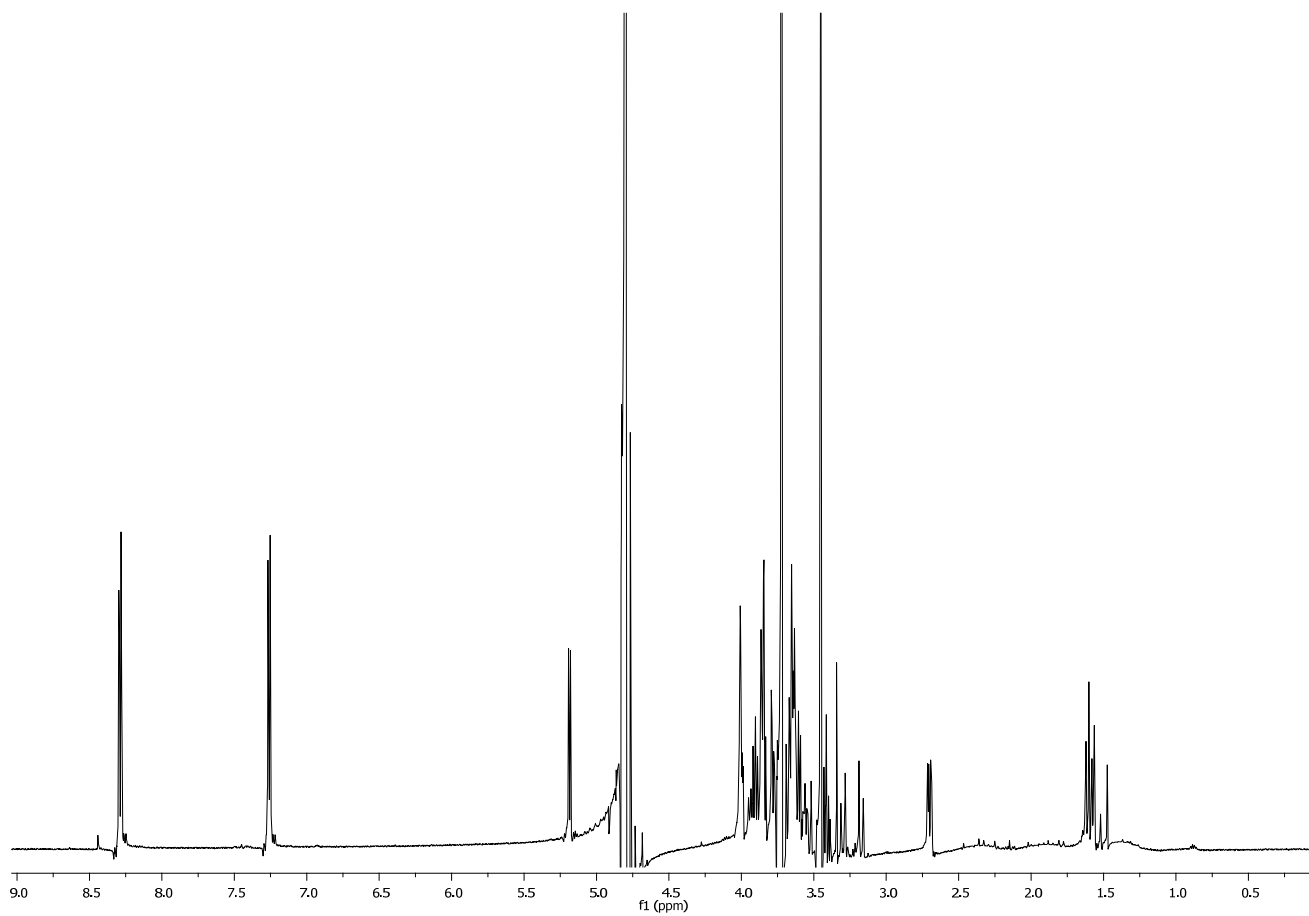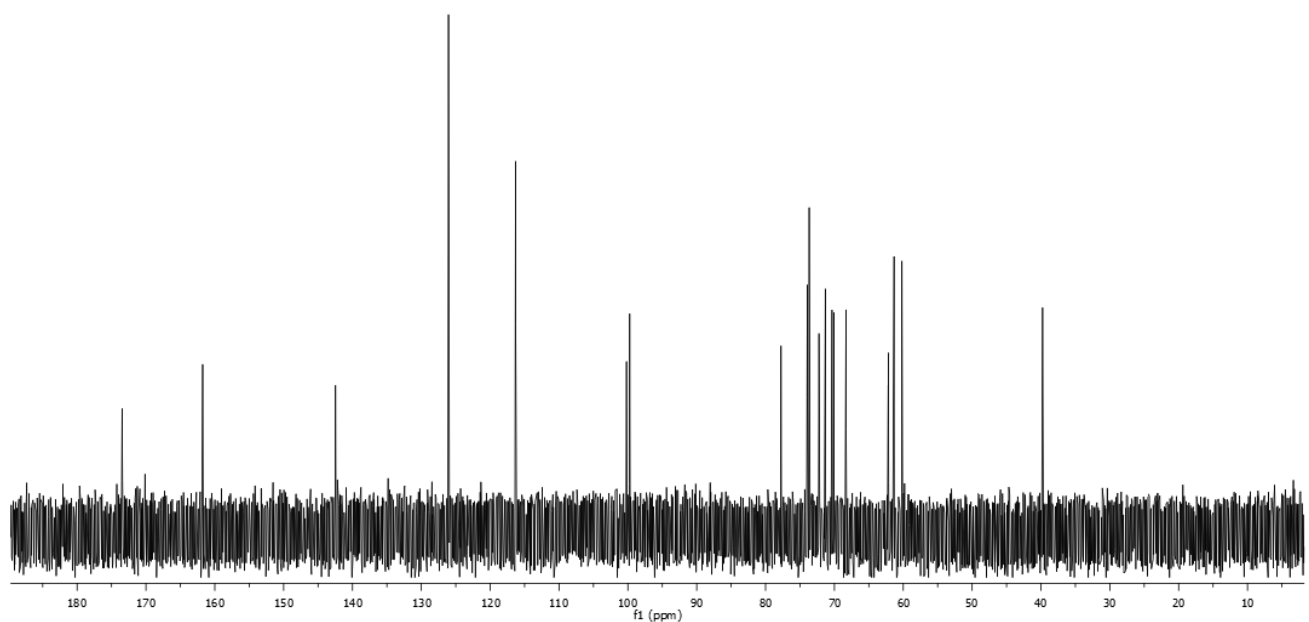

$^1\text{H}$  and  $^{13}\text{C}$  spectra of Compound **7c**, Kdn7Deoxy $\alpha$ 2-6Gal $\beta$ pNP

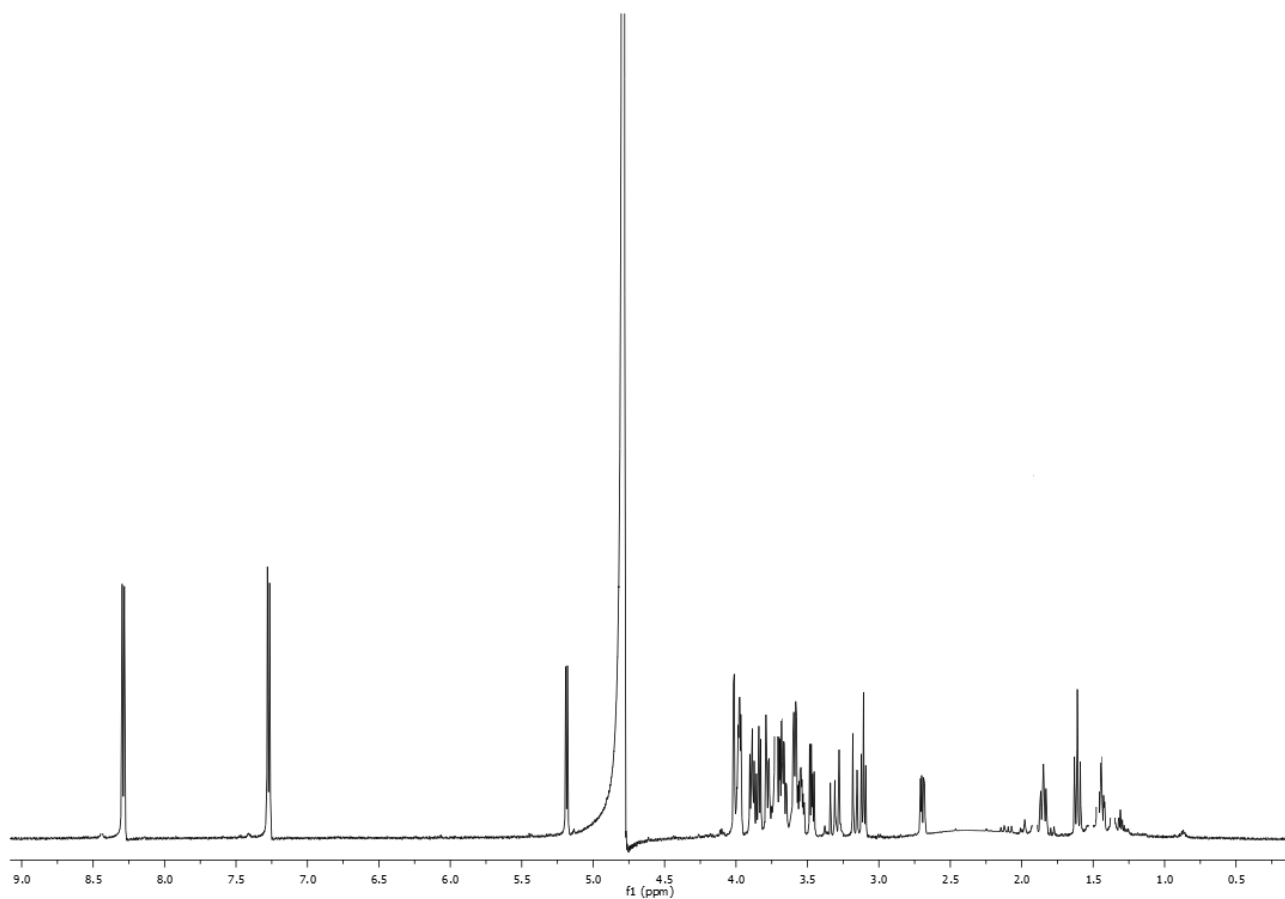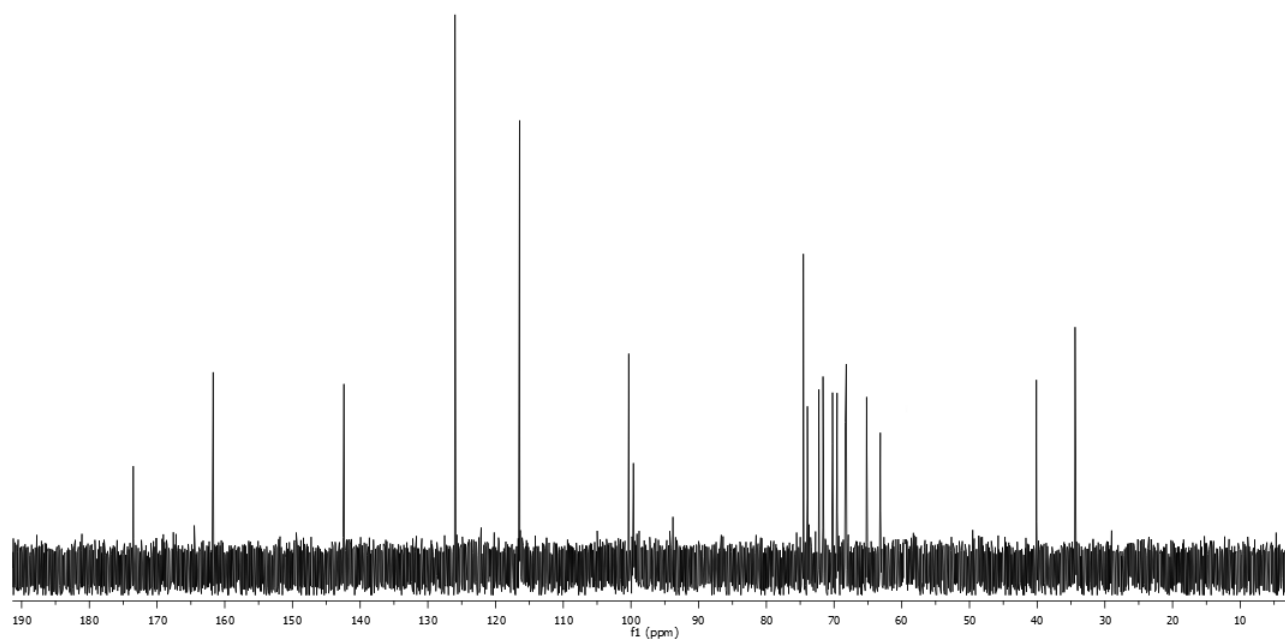



$^1\text{H}$  and  $^{13}\text{C}$  spectra of Compound **8c**, Kdn7N $_3\alpha$ 2-6Gal $\beta$ pNP

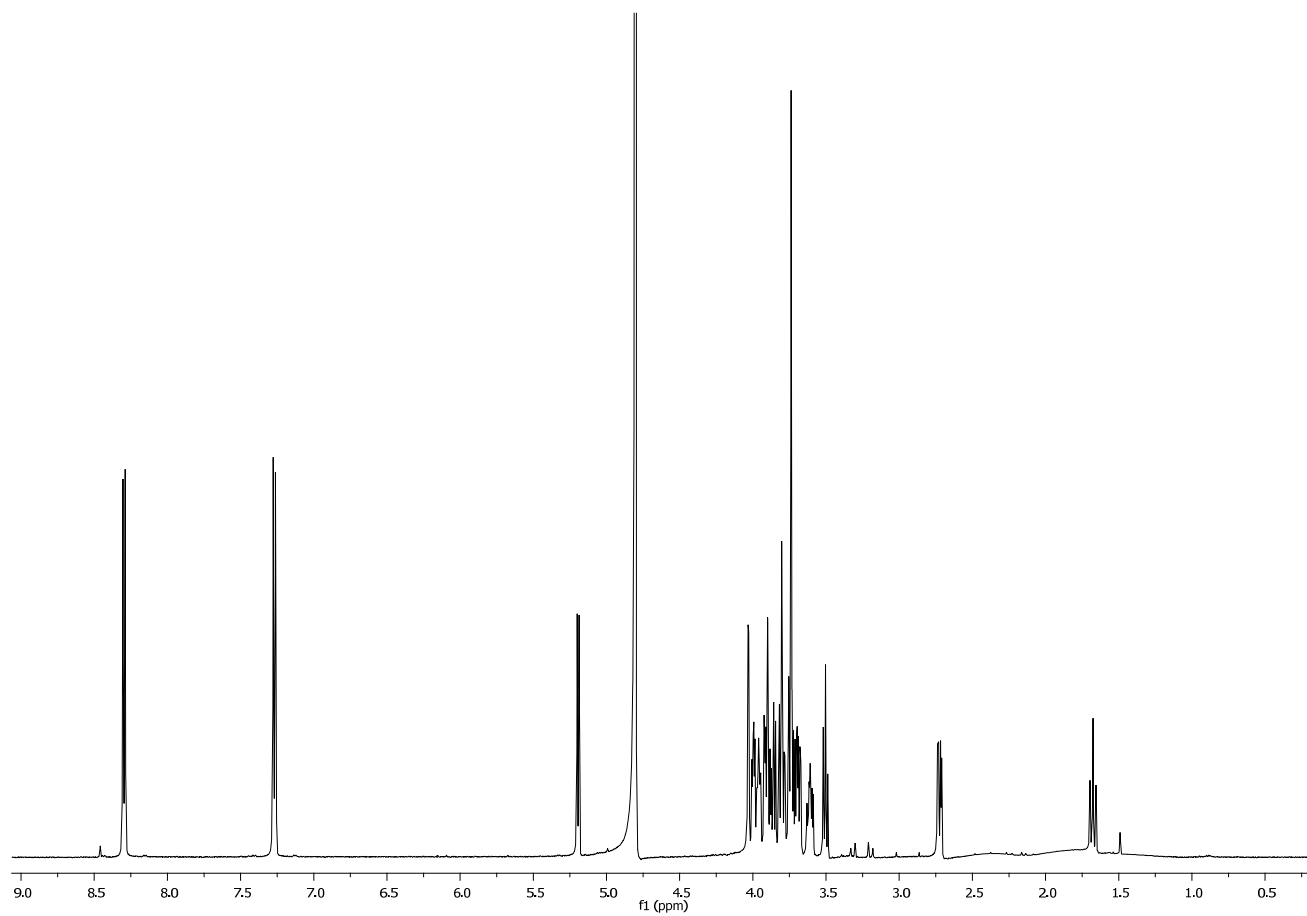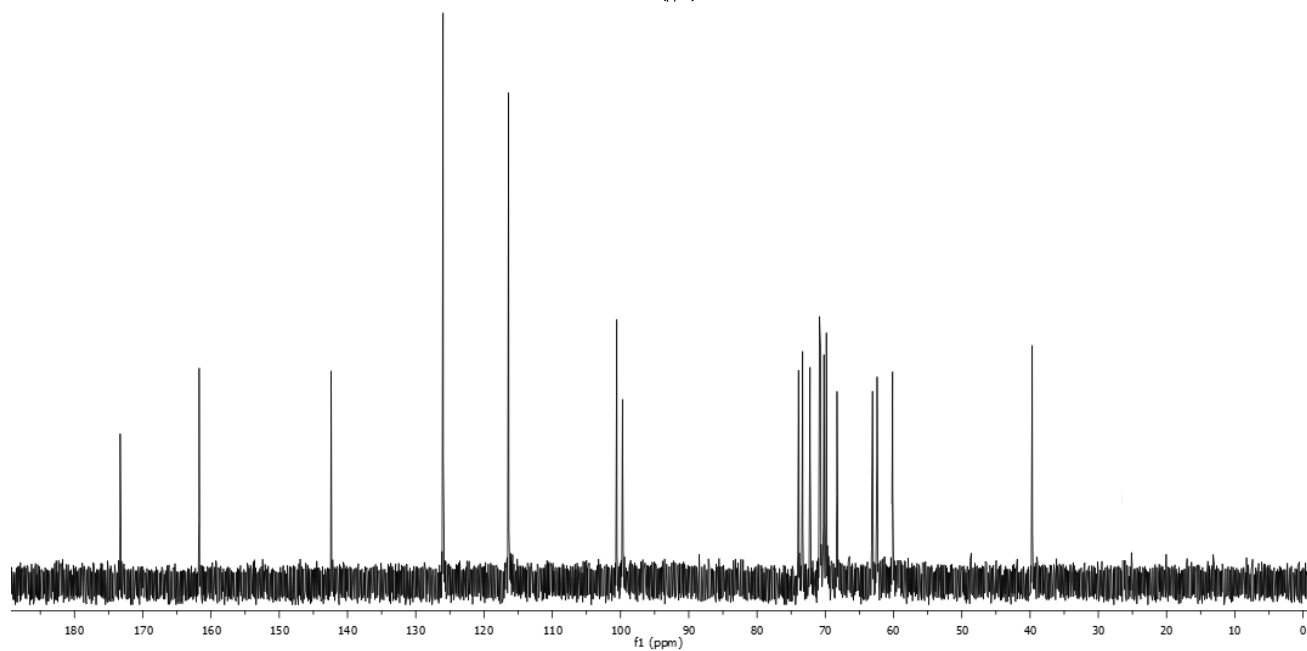

Supplement: NIHMS581062-supplement-01.pdf [file NIHMS581062-supplement-01.pdf]
